# Supplementary material for: Computational analysis of the far infrared spectral region of various deuterated varieties of ethylene glycol
Source: Royal Society of Chemistry journal article supplement (doi:10.1039/d0cp03315d), 2020-01-01
Supplement: d0cp03315d1.pdf [file d0cp03315d1.pdf]

Supplementary material  
Ethylene glycol: CCSD(T)/pCVTZ optimized structures

G1

```
CCSD(T)/CVTZ ENERGY=-229.92811928
C      0.7333056815      0.5705349880      0.2744210468
C      -0.6804751650      0.6012671721      -0.2657744002
O      -1.3153726608      -0.5827747394      0.2217357597
O      1.4292399904      -0.5757435118      -0.1845607410
H      -1.1992678149      1.5013077644      0.0827684964
H      -0.6515522903      0.6040480361      -1.3600226068
H      1.2842448117      1.4447107374      -0.0752612460
H      0.6975250170      0.5995183114      1.3701963531
H      -2.1281550169      -0.7125768720      -0.2705947549
H      0.8433524472      -1.3177068861      -0.0016309072
Rotational constants (MHZ):      15258.4163      5706.4462      4681.2490
CCSD(T)/CVTZ (core,0;) ENERGY=-230.13565907
C      0.7322524095      0.5700059158      0.2737009325
C      -0.6794595640      0.6004257535      -0.2648445725
O      -1.3141625917      -0.5814743578      0.2213709478
O      1.4267134126      -0.5747012119      -0.1841500935
H      -1.1968721120      1.4999563208      0.0832059993
H      -0.6508127566      0.6041235368      -1.3578886678
H      1.2822215559      1.4434594233      -0.0755490615
H      0.6968199844      0.6000638235      1.3682571014
H      -2.1256067711      -0.7127752960      -0.2713030991
H      0.8417514329      -1.3164989080      -0.0015224868
Rotational constants (MHZ):      15303.4219      5722.8338      4694.2296
=====
```

G2

```
CCSD(T)/CVTZ ENERGY=-229.92783073
C      -0.6779869581      0.5971365303      -0.2936914451
C      0.7227247278      0.5719378447      0.2894557131
O      1.4307339540      -0.5731507758      -0.1499211084
O      -1.3770698748      -0.6041240845      0.0418502930
H      1.2841951382      1.4496966149      -0.0366136484
H      0.6618441588      0.6005450503      1.3874660558
H      -1.2237949344      1.4855389342      0.0415340559
H      -0.6238952081      0.6107017748      -1.3825743206
H      0.8008616958      -1.3001307673      -0.0899878460
H      -1.5942686995      -0.5588561217      0.9773752508
Rotational constants (MHZ):      15065.3129      5658.5736      4663.4327
CCSD(T)/CVTZ (core,0;) ENERGY=-230.13535235
C      -0.6769094151      0.5963953849      -0.2928049492
C      0.7216188893      0.5713829809      0.2890028145
O      1.4287918147      -0.5721089706      -0.1485720908
O      -1.3754722603      -0.6025967534      0.0419601244
H      1.2819554373      1.4483505102      -0.0371801107
H      0.6609836389      0.6013472052      1.3857797909
H      -1.2215340505      1.4843093911      0.0416833881
H      -0.6227819950      0.6106129993      -1.3805066367
H      0.8001919469      -1.2993136867      -0.0910139398
H      -1.5935000062      -0.5590840610      0.9765446094
```

Rotational constants (MHZ):      15110.5523      5673.8052      4675.8051

=====

G3

CCSD(T)/ACVTZ ENERGY=-229.94785597

|   |               |               |               |
|---|---------------|---------------|---------------|
| C | -0.7159992599 | 0.5976889942  | -0.2525633835 |
| C | 0.7159992599  | 0.5976889942  | 0.2525633835  |
| O | 1.4263276136  | -0.5531671158 | -0.2051500767 |
| O | -1.4263276136 | -0.5531671158 | 0.2051500767  |
| H | 1.2470330678  | 1.4697594387  | -0.1366437453 |
| H | 0.7227435008  | 0.6448445729  | 1.3467137593  |
| H | -1.2470330678 | 1.4697594387  | 0.1366437453  |
| H | -0.7227435008 | 0.6448445729  | -1.3467137593 |
| H | 1.1792443582  | -1.2855258902 | 0.3673577844  |
| H | -1.1792443582 | -1.2855258902 | -0.3673577844 |

Rotational constants (MHZ):      15040.9076      5540.3951      4540.8101

CCSD(T)/ACVTZ (core,0;) ENERGY=-230.15572306

|   |               |               |               |
|---|---------------|---------------|---------------|
| C | -0.7149144177 | 0.5967954304  | -0.2520283858 |
| C | 0.7149144177  | 0.5967954304  | 0.2520283858  |
| O | 1.4244500078  | -0.5517093811 | -0.2052443807 |
| O | -1.4244500078 | -0.5517093811 | 0.2052443807  |
| H | 1.2446249615  | 1.4688484155  | -0.1358294029 |
| H | 0.7213846954  | 0.6439287964  | 1.3450550604  |
| H | -1.2446249615 | 1.4688484155  | 0.1358294029  |
| H | -0.7213846954 | 0.6439287964  | -1.3450550604 |
| H | 1.1808277016  | -1.2842632611 | 0.3672596723  |
| H | -1.1808277016 | -1.2842632611 | -0.3672596723 |

Rotational constants (MHZ):      15088.45      5554.51      4553.34

=====

**Ethylene glycol: 3D-Potential Energy Surface (in cm<sup>-1</sup>)**

$$V^{HH,DD}(\alpha, \theta_1, \theta_2) = \sum_n \sum_m \sum_l A_{nml} C1(2n\alpha) C2(m\theta_1) C3(l\theta_2)$$

$$V^{DH}(\theta, \theta_1, \theta_2) = \sum_n \sum_m \sum_l A_{nml} C1(n\theta) C2(m\theta_1) C3(l\theta_2)$$

$$C_j(i\gamma) = \cos(i\gamma), C_j(-i\gamma) = \sin(i\gamma) \quad (j = 1,2,3; \gamma = \alpha, \theta_1, \theta_2 \text{ or } \theta, \theta_1, \theta_2)$$

| n | m | l | v        | v <sup>eff</sup> (DD) | v <sup>eff</sup> (DH) |
|---|---|---|----------|-----------------------|-----------------------|
| 0 | 0 | 0 | 1800.668 | 1854.208              | 1906.894              |
| 1 | 0 | 0 | 189.485  | 203.223               | 200.806               |
| 2 | 0 | 0 | 286.791  | 307.949               | 306.920               |
| 3 | 0 | 0 | 752.915  | 777.648               | 778.964               |
| 4 | 0 | 0 | 38.788   | 42.017                | 41.792                |
| 5 | 0 | 0 | 4.991    | 4.991                 | 4.991                 |
| 0 | 1 | 0 | -1.356   | 0.468                 | -1.374                |
| 0 | 0 | 1 | -1.356   | 0.468                 | -2.208                |
| 0 | 1 | 1 | 224.066  | 221.960               | 224.853               |

|   |    |    |          |          |          |
|---|----|----|----------|----------|----------|
| 0 | 2  | 0  | 62.124   | 63.554   | 64.627   |
| 0 | 0  | 2  | 62.124   | 63.554   | 66.307   |
| 0 | 2  | 1  | 35.909   | 35.894   | 34.200   |
| 0 | 1  | 2  | 35.909   | 35.894   | 34.473   |
| 0 | 2  | 2  | 14.066   | 14.021   | 17.787   |
| 0 | 3  | 0  | 178.156  | 182.340  | 179.737  |
| 0 | 0  | 3  | 178.156  | 182.340  | 185.698  |
| 0 | 3  | 1  | 2.347    | 2.276    | 2.324    |
| 0 | 1  | 3  | 2.347    | 2.276    | 4.183    |
| 0 | 3  | 2  | -0.294   | -0.552   | -2.036   |
| 0 | 2  | 3  | -0.294   | -0.552   | -1.435   |
| 0 | 3  | 3  | 0.532    | 0.447    | 4.752    |
| 0 | 4  | 0  | -2.433   | -2.669   | -2.501   |
| 0 | 0  | 4  | -2.433   | -2.669   | -2.771   |
| 0 | 4  | 1  | -1.430   | -1.167   | -3.662   |
| 0 | 1  | 4  | -1.430   | -1.167   | -2.472   |
| 0 | 4  | 2  | -1.240   | -1.229   | -1.147   |
| 0 | 2  | 4  | -1.240   | -1.229   | 0.236    |
| 0 | 4  | 3  | 0.310    | 0.108    | -0.015   |
| 0 | 3  | 4  | 0.310    | 0.108    | -0.161   |
| 0 | 4  | 4  | 0.223    | 0.119    | 1.473    |
| 0 | -1 | -1 | 3.573    | 4.465    | 4.181    |
| 0 | -2 | -1 | 3.017    | 3.361    | 5.059    |
| 0 | -1 | -2 | 3.017    | 3.361    | 3.405    |
| 0 | -2 | -2 | 3.866    | 4.092    | 4.475    |
| 0 | -3 | -1 | 2.217    | 2.409    | 1.914    |
| 0 | -1 | -3 | 2.217    | 2.409    | 3.445    |
| 0 | -3 | -2 | 1.913    | 2.084    | 1.788    |
| 0 | -2 | -3 | 1.913    | 2.084    | 1.484    |
| 0 | -3 | -3 | 0.472    | 0.719    | 1.700    |
| 1 | 1  | 0  | -249.291 | -241.679 | -241.780 |
| 1 | 0  | 1  | -249.291 | -241.679 | -241.185 |
| 1 | 1  | 1  | 468.025  | 463.718  | 461.201  |
| 1 | 2  | 0  | -50.347  | -51.193  | -53.657  |
| 1 | 0  | 2  | -50.347  | -51.193  | -51.369  |
| 1 | 2  | 1  | 139.424  | 140.469  | 143.677  |
| 1 | 1  | 2  | 139.424  | 140.469  | 145.055  |
| 1 | 2  | 2  | 51.160   | 51.414   | 51.660   |
| 1 | 3  | 0  | -14.802  | -15.952  | -17.503  |
| 1 | 0  | 3  | -14.802  | -15.952  | -14.381  |
| 1 | 3  | 1  | 16.044   | 16.053   | 9.459    |
| 1 | 1  | 3  | 16.044   | 16.053   | 13.517   |
| 1 | 3  | 2  | 2.912    | 2.295    | 6.382    |
| 1 | 2  | 3  | 2.912    | 2.295    | 8.051    |
| 1 | 3  | 3  | -1.367   | -2.428   | -1.670   |
| 1 | 4  | 0  | -3.597   | -4.337   | -6.119   |
| 1 | 0  | 4  | -3.597   | -4.337   | -5.518   |
| 1 | 4  | 1  | 1.362    | 1.793    | 0.564    |
| 1 | 1  | 4  | 1.362    | 1.793    | 3.141    |
| 1 | 4  | 2  | -0.458   | -0.342   | -3.067   |
| 1 | 2  | 4  | -0.458   | -0.342   | -0.670   |
| 1 | 4  | 3  | -0.614   | -0.890   | 2.106    |
| 1 | 3  | 4  | -0.614   | -0.890   | 1.959    |
| 1 | 4  | 4  | -0.204   | -0.264   | 0.297    |
| 2 | 1  | 0  | -106.250 | -102.218 | -104.208 |
| 2 | 0  | 1  | -106.250 | -102.218 | -103.375 |
| 2 | 1  | 1  | 239.338  | 238.897  | 236.870  |
| 2 | 2  | 0  | -24.192  | -23.879  | -25.766  |

|   |   |   |         |         |         |
|---|---|---|---------|---------|---------|
| 2 | 0 | 2 | -24.192 | -23.879 | -24.386 |
| 2 | 2 | 1 | 144.021 | 143.486 | 142.900 |
| 2 | 1 | 2 | 144.021 | 143.486 | 145.420 |
| 2 | 2 | 2 | 89.379  | 89.162  | 91.912  |
| 2 | 3 | 0 | -23.159 | -23.235 | -26.037 |
| 2 | 0 | 3 | -23.159 | -23.235 | -23.539 |
| 2 | 3 | 1 | 35.765  | 35.268  | 32.143  |
| 2 | 1 | 3 | 35.765  | 35.268  | 37.241  |
| 2 | 3 | 2 | 20.599  | 20.268  | 21.647  |
| 2 | 2 | 3 | 20.599  | 20.268  | 24.162  |
| 2 | 3 | 3 | -3.569  | -4.774  | -2.642  |
| 2 | 4 | 0 | -6.358  | -6.891  | -8.749  |
| 2 | 0 | 4 | -6.358  | -6.891  | -7.352  |
| 2 | 4 | 1 | 10.697  | 10.815  | 8.733   |
| 2 | 1 | 4 | 10.697  | 10.815  | 11.590  |
| 2 | 4 | 2 | 6.482   | 6.644   | 6.704   |
| 2 | 2 | 4 | 6.482   | 6.644   | 8.287   |
| 2 | 4 | 3 | -2.474  | -2.615  | -1.675  |
| 2 | 3 | 4 | -2.474  | -2.615  | -1.461  |
| 2 | 4 | 4 | -1.381  | -1.182  | -0.703  |
| 3 | 1 | 0 | 2.934   | 4.529   | 0.295   |
| 3 | 0 | 1 | 2.934   | 4.529   | 1.682   |
| 3 | 1 | 1 | 78.025  | 80.243  | 79.040  |
| 3 | 2 | 0 | -23.731 | -21.363 | -22.634 |
| 3 | 0 | 2 | -23.731 | -21.363 | -21.962 |
| 3 | 2 | 1 | 80.633  | 80.575  | 75.771  |
| 3 | 1 | 2 | 80.633  | 80.575  | 79.146  |
| 3 | 2 | 2 | 70.165  | 69.181  | 74.604  |
| 3 | 3 | 0 | -13.489 | -13.986 | -18.253 |
| 3 | 0 | 3 | -13.489 | -13.986 | -16.224 |
| 3 | 3 | 1 | 30.812  | 30.574  | 31.202  |
| 3 | 1 | 3 | 30.812  | 30.574  | 37.223  |
| 3 | 3 | 2 | 20.228  | 19.407  | 17.794  |
| 3 | 2 | 3 | 20.228  | 19.407  | 21.296  |
| 3 | 3 | 3 | 2.718   | 1.168   | 5.197   |
| 3 | 4 | 0 | -14.544 | -15.709 | -17.628 |
| 3 | 0 | 4 | -14.544 | -15.709 | -15.810 |
| 3 | 4 | 1 | 10.625  | 10.550  | 7.562   |
| 3 | 1 | 4 | 10.625  | 10.550  | 10.776  |
| 3 | 4 | 2 | 6.608   | 6.655   | 9.765   |
| 3 | 2 | 4 | 6.608   | 6.655   | 10.481  |
| 3 | 4 | 3 | 1.129   | 1.228   | 0.029   |
| 3 | 3 | 4 | 1.129   | 1.228   | 0.703   |
| 3 | 4 | 4 | 0.772   | 1.339   | 1.638   |
| 4 | 1 | 0 | -0.346  | 0.382   | -0.242  |
| 4 | 0 | 1 | -0.346  | 0.382   | 0.733   |
| 4 | 1 | 1 | 14.414  | 16.179  | 11.904  |
| 4 | 2 | 0 | -1.469  | -1.690  | -4.124  |
| 4 | 0 | 2 | -1.469  | -1.690  | -4.084  |
| 4 | 2 | 1 | 33.467  | 34.087  | 34.735  |
| 4 | 1 | 2 | 33.467  | 34.087  | 36.639  |
| 4 | 2 | 2 | 48.376  | 48.235  | 47.515  |
| 4 | 3 | 0 | -10.647 | -11.058 | -11.650 |
| 4 | 0 | 3 | -10.647 | -11.058 | -10.904 |
| 4 | 3 | 1 | 21.192  | 21.190  | 18.151  |
| 4 | 1 | 3 | 21.192  | 21.190  | 21.436  |
| 4 | 3 | 2 | 18.550  | 18.224  | 20.869  |
| 4 | 2 | 3 | 18.550  | 18.224  | 22.737  |

|   |    |    |          |          |          |
|---|----|----|----------|----------|----------|
| 4 | 3  | 3  | -1.867   | -2.235   | -3.637   |
| 4 | 4  | 0  | -5.436   | -5.770   | -7.725   |
| 4 | 0  | 4  | -5.436   | -5.770   | -6.610   |
| 4 | 4  | 1  | 9.769    | 9.766    | 10.130   |
| 4 | 1  | 4  | 9.769    | 9.766    | 11.762   |
| 4 | 4  | 2  | 9.160    | 9.213    | 9.369    |
| 4 | 2  | 4  | 9.160    | 9.213    | 9.615    |
| 4 | 4  | 3  | -1.598   | -1.581   | -0.604   |
| 4 | 3  | 4  | -1.598   | -1.581   | -0.089   |
| 4 | 4  | 4  | -0.945   | -0.654   | -1.566   |
| 5 | 1  | 0  | 0.632    | 0.632    | 0.632    |
| 5 | 0  | 1  | 0.632    | 0.632    | 0.632    |
| 5 | 1  | 1  | -4.200   | -4.200   | -4.200   |
| 5 | 2  | 0  | 1.173    | 1.173    | 1.173    |
| 5 | 0  | 2  | 1.173    | 1.173    | 1.173    |
| 5 | 2  | 1  | 7.391    | 7.391    | 7.391    |
| 5 | 1  | 2  | 7.391    | 7.391    | 7.391    |
| 5 | 2  | 2  | 20.652   | 20.652   | 20.652   |
| 5 | 3  | 0  | -2.219   | -2.219   | -2.219   |
| 5 | 0  | 3  | -2.219   | -2.219   | -2.219   |
| 5 | 3  | 1  | 11.440   | 11.440   | 11.440   |
| 5 | 1  | 3  | 11.440   | 11.440   | 11.440   |
| 5 | 3  | 2  | 12.871   | 12.871   | 12.871   |
| 5 | 2  | 3  | 12.871   | 12.871   | 12.871   |
| 5 | 3  | 3  | -6.742   | -6.742   | -6.742   |
| 5 | 4  | 0  | -1.566   | -1.566   | -1.566   |
| 5 | 0  | 4  | -1.566   | -1.566   | -1.566   |
| 5 | 4  | 1  | 6.605    | 6.605    | 6.605    |
| 5 | 1  | 4  | 6.605    | 6.605    | 6.605    |
| 5 | 4  | 2  | 7.360    | 7.360    | 7.360    |
| 5 | 2  | 4  | 7.360    | 7.360    | 7.360    |
| 5 | 4  | 3  | -4.519   | -4.519   | -4.519   |
| 5 | 3  | 4  | -4.519   | -4.519   | -4.519   |
| 5 | 4  | 4  | -2.751   | -2.751   | -2.751   |
| 1 | -1 | -1 | -144.423 | -138.494 | -138.801 |
| 1 | -2 | -1 | -53.966  | -50.937  | -48.365  |
| 1 | -1 | -2 | -53.966  | -50.937  | -50.617  |
| 1 | -2 | -2 | -29.709  | -27.242  | -26.560  |
| 1 | -3 | -1 | -5.190   | -4.699   | -5.404   |
| 1 | -1 | -3 | -5.190   | -4.699   | -3.075   |
| 1 | -3 | -2 | 0.445    | 0.956    | 0.714    |
| 1 | -2 | -3 | 0.445    | 0.956    | 0.409    |
| 1 | -3 | -3 | 1.833    | 2.066    | 3.518    |
| 2 | -1 | -1 | -142.637 | -139.480 | -139.162 |
| 2 | -2 | -1 | -123.214 | -120.792 | -120.331 |
| 2 | -1 | -2 | -123.214 | -120.792 | -120.059 |
| 2 | -2 | -2 | -101.460 | -100.123 | -99.344  |
| 2 | -3 | -1 | -20.812  | -20.397  | -20.227  |
| 2 | -1 | -3 | -20.812  | -20.397  | -19.902  |
| 2 | -3 | -2 | -21.564  | -21.278  | -20.385  |
| 2 | -2 | -3 | -21.564  | -21.278  | -20.246  |
| 2 | -3 | -3 | -1.266   | -1.154   | -0.617   |
| 3 | -1 | -1 | -85.364  | -85.376  | -84.396  |
| 3 | -2 | -1 | -69.224  | -67.253  | -68.731  |
| 3 | -1 | -2 | -69.224  | -67.253  | -65.996  |
| 3 | -2 | -2 | -83.565  | -81.509  | -80.289  |
| 3 | -3 | -1 | -19.363  | -18.722  | -17.573  |
| 3 | -1 | -3 | -19.363  | -18.722  | -19.228  |

|    |    |    |          |          |          |
|----|----|----|----------|----------|----------|
| 3  | -3 | -2 | -19.855  | -19.139  | -17.662  |
| 3  | -2 | -3 | -19.855  | -19.139  | -17.068  |
| 3  | -3 | -3 | -0.860   | -0.476   | -0.968   |
| 4  | -1 | -1 | -23.467  | -23.435  | -22.496  |
| 4  | -2 | -1 | -30.206  | -29.290  | -30.384  |
| 4  | -1 | -2 | -30.206  | -29.290  | -28.389  |
| 4  | -2 | -2 | -42.986  | -41.887  | -40.871  |
| 4  | -3 | -1 | -13.087  | -12.764  | -11.894  |
| 4  | -1 | -3 | -13.087  | -12.764  | -13.115  |
| 4  | -3 | -2 | -13.973  | -13.612  | -12.844  |
| 4  | -2 | -3 | -13.973  | -13.612  | -12.390  |
| 4  | -3 | -3 | -3.131   | -2.929   | -3.357   |
| 5  | -1 | -1 | -2.094   | -2.094   | -2.094   |
| 5  | -2 | -1 | -6.798   | -6.798   | -6.798   |
| 5  | -1 | -2 | -6.798   | -6.798   | -6.798   |
| 5  | -2 | -2 | -12.552  | -12.552  | -12.552  |
| 5  | -3 | -1 | -6.037   | -6.037   | -6.037   |
| 5  | -1 | -3 | -6.037   | -6.037   | -6.037   |
| 5  | -3 | -2 | -8.136   | -8.136   | -8.136   |
| 5  | -2 | -3 | -8.136   | -8.136   | -8.136   |
| 5  | -3 | -3 | -3.000   | -3.000   | -3.000   |
| -1 | -1 | 0  | 148.747  | 141.146  | 142.001  |
| -1 | 0  | -1 | 148.747  | 141.146  | 141.418  |
| -1 | 1  | -1 | -254.919 | -248.909 | -248.885 |
| -1 | -1 | 1  | -254.919 | -248.909 | -248.686 |
| -1 | -2 | 0  | 73.752   | 73.235   | 75.296   |
| -1 | 0  | -2 | 73.752   | 73.235   | 75.508   |
| -1 | 2  | -1 | -72.509  | -71.476  | -72.013  |
| -1 | -1 | 2  | -72.509  | -71.476  | -71.281  |
| -1 | -2 | 1  | -129.882 | -127.147 | -128.025 |
| -1 | 1  | -2 | -129.882 | -127.147 | -127.955 |
| -1 | 2  | -2 | -46.773  | -46.495  | -46.664  |
| -1 | -2 | 2  | -46.773  | -46.495  | -49.142  |
| -1 | -3 | 0  | 22.481   | 22.118   | 22.341   |
| -1 | 0  | -3 | 22.481   | 22.118   | 24.153   |
| -1 | 3  | -1 | -10.084  | -9.993   | -10.256  |
| -1 | -1 | 3  | -10.084  | -9.993   | -9.265   |
| -1 | -3 | 1  | -23.999  | -23.666  | -23.614  |
| -1 | 1  | -3 | -23.999  | -23.666  | -25.064  |
| -1 | 3  | -2 | -6.990   | -7.146   | -6.661   |
| -1 | -2 | 3  | -6.990   | -7.146   | -6.018   |
| -1 | -3 | 2  | -7.238   | -7.297   | -7.455   |
| -1 | 2  | -3 | -7.238   | -7.297   | -7.775   |
| -1 | 3  | -3 | 0.669    | 0.538    | 2.527    |
| -1 | -3 | 3  | 0.669    | 0.538    | 1.231    |
| -1 | 4  | -1 | -1.917   | -1.832   | -0.563   |
| -1 | -1 | 4  | -1.917   | -1.832   | -1.915   |
| -1 | 4  | -2 | -1.691   | -1.682   | -1.323   |
| -1 | -2 | 4  | -1.691   | -1.682   | 0.068    |
| -1 | 4  | -3 | 0.561    | 0.583    | 0.235    |
| -1 | -3 | 4  | 0.561    | 0.583    | 0.437    |
| -2 | -1 | 0  | 77.266   | 70.087   | 70.853   |
| -2 | 0  | -1 | 77.266   | 70.087   | 69.336   |
| -2 | 1  | -1 | -196.595 | -193.093 | -192.911 |
| -2 | -1 | 1  | -196.595 | -193.093 | -192.972 |
| -2 | -2 | 0  | 11.103   | 6.448    | 9.108    |
| -2 | 0  | -2 | 11.103   | 6.448    | 9.748    |
| -2 | 2  | -1 | -113.031 | -111.505 | -112.170 |

|    |    |    |          |          |          |
|----|----|----|----------|----------|----------|
| -2 | -1 | 2  | -113.031 | -111.505 | -111.344 |
| -2 | -2 | 1  | -173.708 | -172.079 | -173.328 |
| -2 | 1  | -2 | -173.708 | -172.079 | -172.835 |
| -2 | 2  | -2 | -100.214 | -100.317 | -100.749 |
| -2 | -2 | 2  | -100.214 | -100.317 | -104.479 |
| -2 | -3 | 0  | 19.359   | 18.384   | 18.784   |
| -2 | 0  | -3 | 19.359   | 18.384   | 21.084   |
| -2 | 3  | -1 | -21.712  | -21.793  | -22.238  |
| -2 | -1 | 3  | -21.712  | -21.793  | -21.034  |
| -2 | -3 | 1  | -35.029  | -34.678  | -34.951  |
| -2 | 1  | -3 | -35.029  | -34.678  | -36.980  |
| -2 | 3  | -2 | -22.295  | -22.957  | -22.218  |
| -2 | -2 | 3  | -22.295  | -22.957  | -21.464  |
| -2 | -3 | 2  | -17.070  | -16.967  | -17.038  |
| -2 | 2  | -3 | -17.070  | -16.967  | -17.568  |
| -2 | 3  | -3 | 0.071    | -0.057   | 2.704    |
| -2 | -3 | 3  | 0.071    | -0.057   | 0.838    |
| -2 | 4  | -1 | -5.224   | -5.340   | -3.555   |
| -2 | -1 | 4  | -5.224   | -5.340   | -5.540   |
| -2 | 4  | -2 | -5.853   | -6.311   | -5.819   |
| -2 | -2 | 4  | -5.853   | -6.311   | -3.976   |
| -2 | 4  | -3 | 0.438    | 0.254    | -0.096   |
| -2 | -3 | 4  | 0.438    | 0.254    | 0.141    |
| -3 | -1 | 0  | -93.674  | -100.014 | -99.594  |
| -3 | 0  | -1 | -93.674  | -100.014 | -100.900 |
| -3 | 1  | -1 | -84.301  | -83.835  | -83.707  |
| -3 | -1 | 1  | -84.301  | -83.835  | -84.007  |
| -3 | -2 | 0  | 61.277   | 60.557   | 62.260   |
| -3 | 0  | -2 | 61.277   | 60.557   | 62.297   |
| -3 | 2  | -1 | -62.940  | -62.342  | -62.871  |
| -3 | -1 | 2  | -62.940  | -62.342  | -62.125  |
| -3 | -2 | 1  | -83.391  | -82.294  | -82.871  |
| -3 | 1  | -2 | -83.391  | -82.294  | -82.344  |
| -3 | 2  | -2 | -65.477  | -64.580  | -65.332  |
| -3 | -2 | 2  | -65.477  | -64.580  | -67.724  |
| -3 | -3 | 0  | 13.090   | 13.780   | 14.143   |
| -3 | 0  | -3 | 13.090   | 13.780   | 15.817   |
| -3 | 3  | -1 | -16.855  | -16.741  | -17.206  |
| -3 | -1 | 3  | -16.855  | -16.741  | -16.456  |
| -3 | -3 | 1  | -23.579  | -23.121  | -23.757  |
| -3 | 1  | -3 | -23.579  | -23.121  | -25.133  |
| -3 | 3  | -2 | -15.135  | -15.395  | -14.862  |
| -3 | -2 | 3  | -15.135  | -15.395  | -14.253  |
| -3 | -3 | 2  | -14.958  | -14.486  | -14.311  |
| -3 | 2  | -3 | -14.958  | -14.486  | -14.791  |
| -3 | 3  | -3 | -0.639   | -0.707   | 1.174    |
| -3 | -3 | 3  | -0.639   | -0.707   | -0.173   |
| -3 | 4  | -1 | -3.475   | -3.433   | -2.178   |
| -3 | -1 | 4  | -3.475   | -3.433   | -3.552   |
| -3 | 4  | -2 | -4.268   | -4.553   | -4.246   |
| -3 | -2 | 4  | -4.268   | -4.553   | -2.942   |
| -3 | 4  | -3 | -0.065   | -0.227   | -0.252   |
| -3 | -3 | 4  | -0.065   | -0.227   | -0.133   |
| -4 | -1 | 0  | -5.349   | -5.349   | -5.349   |
| -4 | 0  | -1 | -5.349   | -5.349   | -5.349   |
| -4 | 1  | -1 | -20.396  | -20.396  | -20.396  |
| -4 | -1 | 1  | -20.396  | -20.396  | -20.396  |
| -4 | -2 | 0  | -4.080   | -4.080   | -4.080   |

|    |    |    |         |         |         |
|----|----|----|---------|---------|---------|
| -4 | 0  | -2 | -4.080  | -4.080  | -4.080  |
| -4 | 2  | -1 | -41.886 | -41.886 | -41.886 |
| -4 | -1 | 2  | -41.886 | -41.886 | -41.886 |
| -4 | -2 | 1  | -37.647 | -37.647 | -37.647 |
| -4 | 1  | -2 | -37.647 | -37.647 | -37.647 |
| -4 | 2  | -2 | -65.181 | -65.181 | -65.181 |
| -4 | -2 | 2  | -65.181 | -65.181 | -65.181 |
| -4 | -3 | 0  | 2.931   | 2.931   | 2.931   |
| -4 | 0  | -3 | 2.931   | 2.931   | 2.931   |
| -4 | 3  | -1 | -28.189 | -28.189 | -28.189 |
| -4 | -1 | 3  | -28.189 | -28.189 | -28.189 |
| -4 | -3 | 1  | -19.729 | -19.729 | -19.729 |
| -4 | 1  | -3 | -19.729 | -19.729 | -19.729 |
| -4 | 3  | -2 | -35.235 | -35.235 | -35.235 |
| -4 | -2 | 3  | -35.235 | -35.235 | -35.235 |
| -4 | -3 | 2  | -19.374 | -19.374 | -19.374 |
| -4 | 2  | -3 | -19.374 | -19.374 | -19.374 |
| -4 | 3  | -3 | -1.203  | -1.203  | -1.203  |
| -4 | -3 | 3  | -1.203  | -1.203  | -1.203  |
| -4 | 4  | -1 | -13.143 | -13.143 | -13.143 |
| -4 | -1 | 4  | -13.143 | -13.143 | -13.143 |
| -4 | 4  | -2 | -17.503 | -17.503 | -17.503 |
| -4 | -2 | 4  | -17.503 | -17.503 | -17.503 |
| -4 | 4  | -3 | 1.143   | 1.143   | 1.143   |
| -4 | -3 | 4  | 1.143   | 1.143   | 1.143   |

### Ethylene glycol: Kinetic Energy Parameters of the torsional Hamiltonian

#### CH<sub>2</sub>OH-CH<sub>2</sub>OH

| n | m | l | B <sub>2α2α</sub> | B <sub>2α01</sub> | B <sub>0101</sub> | B <sub>2α02</sub> | B <sub>0102</sub> | B <sub>0202</sub> |
|---|---|---|-------------------|-------------------|-------------------|-------------------|-------------------|-------------------|
| 0 | 0 | 0 | 0.5255            | -0.3559           | 22.1877           | -0.3559           | -0.0269           | 22.1877           |
| 1 | 0 | 0 | 0.0881            | -0.2386           | -0.1182           | -0.2386           | 0.7589            | -0.1182           |
| 2 | 0 | 0 | 0.0514            | -0.0696           | 0.1228            | -0.0696           | 0.0243            | 0.1228            |
| 3 | 0 | 0 | 0.0194            | -0.0301           | 0.0158            | -0.0301           | 0.0543            | 0.0158            |
| 4 | 0 | 0 | 0.0069            | -0.0082           | 0.0145            | -0.0082           | 0.0032            | 0.0145            |
| 5 | 0 | 0 | 0.0008            | -0.0011           | -0.0030           | -0.0011           | 0.0036            | -0.0030           |
| 0 | 1 | 0 | 0.0144            | -0.5320           | 0.6697            | 0.0015            | -0.0035           | 0.0766            |
| 0 | 0 | 1 | 0.0144            | 0.0015            | 0.0766            | -0.5320           | -0.0035           | 0.6697            |
| 0 | 1 | 1 | 0.0057            | -0.0094           | 0.0582            | -0.0094           | 0.0025            | 0.0582            |
| 0 | 2 | 0 | 0.0056            | -0.0028           | 0.3867            | 0.0000            | -0.0011           | 0.0253            |
| 0 | 0 | 2 | 0.0056            | 0.0000            | 0.0253            | -0.0028           | -0.0011           | 0.3867            |
| 0 | 2 | 1 | 0.0015            | -0.0031           | 0.0466            | -0.0024           | 0.0015            | 0.0352            |
| 0 | 1 | 2 | 0.0015            | -0.0024           | 0.0352            | -0.0031           | 0.0015            | 0.0466            |
| 0 | 2 | 2 | 0.0004            | -0.0011           | 0.0129            | -0.0011           | 0.0008            | 0.0129            |
| 0 | 3 | 0 | 0.0002            | -0.0074           | 0.1229            | -0.0000           | -0.0016           | 0.0029            |
| 0 | 0 | 3 | 0.0002            | -0.0000           | 0.0029            | -0.0074           | -0.0016           | 0.1229            |
| 0 | 3 | 1 | 0.0001            | -0.0012           | 0.0040            | -0.0002           | 0.0014            | 0.0028            |
| 0 | 1 | 3 | 0.0001            | -0.0002           | 0.0028            | -0.0012           | 0.0014            | 0.0040            |
| 0 | 3 | 2 | -0.0000           | -0.0004           | 0.0030            | 0.0000            | 0.0007            | 0.0003            |
| 0 | 2 | 3 | -0.0000           | 0.0000            | 0.0003            | -0.0004           | 0.0007            | 0.0030            |
| 0 | 3 | 3 | -0.0000           | 0.0000            | 0.0002            | 0.0000            | 0.0003            | 0.0002            |
| 0 | 4 | 0 | 0.0005            | -0.0022           | 0.0143            | 0.0001            | -0.0005           | -0.0002           |
| 0 | 0 | 4 | 0.0005            | 0.0001            | -0.0002           | -0.0022           | -0.0005           | 0.0143            |
| 0 | 4 | 1 | -0.0001           | -0.0000           | -0.0014           | 0.0001            | 0.0003            | -0.0001           |
| 0 | 1 | 4 | -0.0001           | 0.0001            | -0.0001           | -0.0000           | 0.0003            | -0.0014           |
| 0 | 4 | 2 | -0.0001           | -0.0001           | -0.0009           | 0.0001            | 0.0002            | -0.0009           |



|   |    |    |         |         |         |         |         |         |
|---|----|----|---------|---------|---------|---------|---------|---------|
| 0 | 2  | 4  | -0.0001 | 0.0001  | -0.0009 | -0.0001 | 0.0002  | -0.0009 |
| 0 | 4  | 3  | -0.0000 | -0.0000 | -0.0006 | -0.0000 | 0.0001  | -0.0001 |
| 0 | 3  | 4  | -0.0000 | -0.0000 | -0.0001 | -0.0000 | 0.0001  | -0.0006 |
| 0 | 4  | 4  | -0.0000 | 0.0000  | -0.0001 | 0.0000  | -0.0000 | -0.0001 |
| 0 | -1 | -1 | -0.0002 | 0.0010  | 0.0041  | 0.0010  | -0.1192 | 0.0041  |
| 0 | -2 | -1 | 0.0001  | -0.0001 | 0.0046  | 0.0003  | -0.0020 | 0.0060  |
| 0 | -1 | -2 | 0.0001  | 0.0003  | 0.0060  | -0.0001 | -0.0020 | 0.0046  |
| 0 | -2 | -2 | 0.0002  | -0.0000 | 0.0047  | -0.0000 | -0.0018 | 0.0047  |
| 0 | -3 | -1 | 0.0001  | 0.0001  | 0.0024  | -0.0002 | -0.0013 | 0.0013  |
| 0 | -1 | -3 | 0.0001  | -0.0002 | 0.0013  | 0.0001  | -0.0013 | 0.0024  |
| 0 | -3 | -2 | 0.0001  | 0.0001  | 0.0019  | -0.0000 | -0.0010 | 0.0007  |
| 0 | -2 | -3 | 0.0001  | -0.0000 | 0.0007  | 0.0001  | -0.0010 | 0.0019  |
| 0 | -3 | -3 | -0.0000 | 0.0001  | -0.0011 | 0.0001  | -0.0004 | -0.0011 |
| 1 | 1  | 0  | 0.0061  | 0.0182  | -0.0268 | -0.0120 | -0.0045 | 0.1092  |
| 1 | 0  | 1  | 0.0061  | -0.0120 | 0.1092  | 0.0182  | -0.0045 | -0.0268 |
| 1 | 1  | 1  | 0.0108  | -0.0151 | 0.1343  | -0.0151 | 0.0002  | 0.1343  |
| 1 | 2  | 0  | -0.0032 | 0.0028  | -0.0280 | 0.0009  | -0.0052 | 0.0542  |
| 1 | 0  | 2  | -0.0032 | 0.0009  | 0.0542  | 0.0028  | -0.0052 | -0.0280 |
| 1 | 2  | 1  | 0.0037  | -0.0071 | 0.1263  | -0.0052 | 0.0007  | 0.0664  |
| 1 | 1  | 2  | 0.0037  | -0.0052 | 0.0664  | -0.0071 | 0.0007  | 0.1263  |
| 1 | 2  | 2  | 0.0016  | -0.0030 | 0.0510  | -0.0030 | 0.0011  | 0.0510  |
| 1 | 3  | 0  | 0.0003  | 0.0015  | -0.0188 | -0.0004 | 0.0007  | 0.0075  |
| 1 | 0  | 3  | 0.0003  | -0.0004 | 0.0075  | 0.0015  | 0.0007  | -0.0188 |
| 1 | 3  | 1  | 0.0005  | -0.0036 | 0.0318  | -0.0005 | 0.0011  | 0.0047  |
| 1 | 1  | 3  | 0.0005  | -0.0005 | 0.0047  | -0.0036 | 0.0011  | 0.0318  |
| 1 | 3  | 2  | 0.0002  | -0.0014 | 0.0118  | -0.0002 | 0.0012  | 0.0029  |
| 1 | 2  | 3  | 0.0002  | -0.0002 | 0.0029  | -0.0014 | 0.0012  | 0.0118  |
| 1 | 3  | 3  | -0.0001 | -0.0001 | -0.0007 | -0.0001 | 0.0009  | -0.0007 |
| 1 | 4  | 0  | 0.0001  | 0.0004  | -0.0077 | -0.0003 | 0.0002  | 0.0023  |
| 1 | 0  | 4  | 0.0001  | -0.0003 | 0.0023  | 0.0004  | 0.0002  | -0.0077 |
| 1 | 4  | 1  | 0.0000  | -0.0006 | 0.0074  | -0.0000 | 0.0002  | 0.0007  |
| 1 | 1  | 4  | 0.0000  | -0.0000 | 0.0007  | -0.0006 | 0.0002  | 0.0074  |
| 1 | 4  | 2  | -0.0000 | -0.0003 | 0.0023  | 0.0000  | 0.0003  | 0.0001  |
| 1 | 2  | 4  | -0.0000 | 0.0000  | 0.0001  | -0.0003 | 0.0003  | 0.0023  |
| 1 | 4  | 3  | -0.0000 | 0.0001  | -0.0006 | 0.0000  | 0.0002  | -0.0005 |
| 1 | 3  | 4  | -0.0000 | 0.0000  | -0.0005 | 0.0001  | 0.0002  | -0.0006 |
| 1 | 4  | 4  | -0.0000 | 0.0001  | -0.0006 | 0.0001  | -0.0000 | -0.0006 |
| 2 | 1  | 0  | 0.0004  | 0.0014  | -0.0055 | 0.0002  | -0.0015 | 0.0262  |
| 2 | 0  | 1  | 0.0004  | 0.0002  | 0.0262  | 0.0014  | -0.0015 | -0.0055 |
| 2 | 1  | 1  | 0.0073  | -0.0106 | 0.0634  | -0.0106 | 0.0077  | 0.0634  |
| 2 | 2  | 0  | 0.0006  | 0.0010  | 0.0111  | -0.0029 | -0.0005 | 0.0362  |
| 2 | 0  | 2  | 0.0006  | -0.0029 | 0.0362  | 0.0010  | -0.0005 | 0.0111  |
| 2 | 2  | 1  | 0.0046  | -0.0060 | 0.1138  | -0.0072 | 0.0006  | 0.0554  |
| 2 | 1  | 2  | 0.0046  | -0.0072 | 0.0554  | -0.0060 | 0.0006  | 0.1138  |
| 2 | 2  | 2  | 0.0032  | -0.0048 | 0.0852  | -0.0048 | 0.0008  | 0.0852  |
| 2 | 3  | 0  | -0.0001 | -0.0000 | -0.0242 | -0.0001 | -0.0004 | 0.0079  |
| 2 | 0  | 3  | -0.0001 | -0.0001 | 0.0079  | -0.0000 | -0.0004 | -0.0242 |
| 2 | 3  | 1  | 0.0011  | -0.0035 | 0.0552  | -0.0015 | -0.0007 | 0.0050  |
| 2 | 1  | 3  | 0.0011  | -0.0015 | 0.0050  | -0.0035 | -0.0007 | 0.0552  |
| 2 | 3  | 2  | 0.0009  | -0.0029 | 0.0397  | -0.0009 | 0.0006  | 0.0162  |
| 2 | 2  | 3  | 0.0009  | -0.0009 | 0.0162  | -0.0029 | 0.0006  | 0.0397  |
| 2 | 3  | 3  | -0.0001 | -0.0002 | 0.0017  | -0.0002 | 0.0006  | 0.0017  |
| 2 | 4  | 0  | -0.0002 | 0.0003  | -0.0109 | 0.0003  | -0.0003 | 0.0021  |
| 2 | 0  | 4  | -0.0002 | 0.0003  | 0.0021  | 0.0003  | -0.0003 | -0.0109 |
| 2 | 4  | 1  | 0.0003  | -0.0011 | 0.0197  | -0.0003 | -0.0002 | -0.0000 |
| 2 | 1  | 4  | 0.0003  | -0.0003 | -0.0000 | -0.0011 | -0.0002 | 0.0197  |
| 2 | 4  | 2  | 0.0003  | -0.0009 | 0.0153  | -0.0002 | 0.0003  | 0.0049  |
| 2 | 2  | 4  | 0.0003  | -0.0002 | 0.0049  | -0.0009 | 0.0003  | 0.0153  |

|   |   |   |         |         |         |         |         |         |
|---|---|---|---------|---------|---------|---------|---------|---------|
| 2 | 4 | 3 | -0.0001 | 0.0001  | -0.0006 | 0.0000  | 0.0002  | -0.0005 |
| 2 | 3 | 4 | -0.0001 | 0.0000  | -0.0005 | 0.0001  | 0.0002  | -0.0006 |
| 2 | 4 | 4 | -0.0001 | 0.0001  | -0.0005 | 0.0001  | -0.0000 | -0.0005 |
| 3 | 1 | 0 | 0.0011  | -0.0011 | 0.0595  | -0.0006 | -0.0016 | 0.0019  |
| 3 | 0 | 1 | 0.0011  | -0.0006 | 0.0019  | -0.0011 | -0.0016 | 0.0595  |
| 3 | 1 | 1 | 0.0037  | -0.0057 | 0.0226  | -0.0057 | 0.0063  | 0.0226  |
| 3 | 2 | 0 | -0.0005 | 0.0008  | -0.0367 | -0.0012 | 0.0019  | 0.0137  |
| 3 | 0 | 2 | -0.0005 | -0.0012 | 0.0137  | 0.0008  | 0.0019  | -0.0367 |
| 3 | 2 | 1 | 0.0035  | -0.0040 | 0.0626  | -0.0055 | 0.0010  | 0.0280  |
| 3 | 1 | 2 | 0.0035  | -0.0055 | 0.0280  | -0.0040 | 0.0010  | 0.0626  |
| 3 | 2 | 2 | 0.0030  | -0.0040 | 0.0651  | -0.0040 | 0.0003  | 0.0651  |
| 3 | 3 | 0 | 0.0001  | 0.0006  | -0.0319 | 0.0001  | 0.0002  | 0.0055  |
| 3 | 0 | 3 | 0.0001  | 0.0001  | 0.0055  | 0.0006  | 0.0002  | -0.0319 |
| 3 | 3 | 1 | 0.0011  | -0.0021 | 0.0429  | -0.0015 | -0.0016 | 0.0047  |
| 3 | 1 | 3 | 0.0011  | -0.0015 | 0.0047  | -0.0021 | -0.0016 | 0.0429  |
| 3 | 3 | 2 | 0.0008  | -0.0022 | 0.0372  | -0.0009 | 0.0000  | 0.0168  |
| 3 | 2 | 3 | 0.0008  | -0.0009 | 0.0168  | -0.0022 | 0.0000  | 0.0372  |
| 3 | 3 | 3 | 0.0002  | -0.0007 | 0.0074  | -0.0007 | 0.0008  | 0.0074  |
| 3 | 4 | 0 | -0.0001 | 0.0006  | -0.0188 | 0.0001  | -0.0001 | 0.0026  |
| 3 | 0 | 4 | -0.0001 | 0.0001  | 0.0026  | 0.0006  | -0.0001 | -0.0188 |
| 3 | 4 | 1 | 0.0003  | -0.0008 | 0.0160  | -0.0004 | -0.0003 | 0.0012  |
| 3 | 1 | 4 | 0.0003  | -0.0004 | 0.0012  | -0.0008 | -0.0003 | 0.0160  |
| 3 | 4 | 2 | 0.0002  | -0.0008 | 0.0129  | -0.0003 | 0.0002  | 0.0056  |
| 3 | 2 | 4 | 0.0002  | -0.0003 | 0.0056  | -0.0008 | 0.0002  | 0.0129  |
| 3 | 4 | 3 | 0.0001  | -0.0003 | 0.0029  | -0.0003 | 0.0003  | 0.0021  |
| 3 | 3 | 4 | 0.0001  | -0.0003 | 0.0021  | -0.0003 | 0.0003  | 0.0029  |
| 3 | 4 | 4 | 0.0000  | -0.0001 | 0.0010  | -0.0001 | 0.0000  | 0.0010  |
| 4 | 1 | 0 | 0.0005  | 0.0002  | -0.0011 | -0.0010 | -0.0007 | -0.0031 |
| 4 | 0 | 1 | 0.0005  | -0.0010 | -0.0031 | 0.0002  | -0.0007 | -0.0011 |
| 4 | 1 | 1 | 0.0012  | -0.0020 | 0.0036  | -0.0020 | 0.0032  | 0.0036  |
| 4 | 2 | 0 | 0.0000  | -0.0002 | -0.0049 | -0.0004 | 0.0009  | 0.0031  |
| 4 | 0 | 2 | 0.0000  | -0.0004 | 0.0031  | -0.0002 | 0.0009  | -0.0049 |
| 4 | 2 | 1 | 0.0018  | -0.0019 | 0.0215  | -0.0030 | 0.0013  | 0.0097  |
| 4 | 1 | 2 | 0.0018  | -0.0030 | 0.0097  | -0.0019 | 0.0013  | 0.0215  |
| 4 | 2 | 2 | 0.0024  | -0.0030 | 0.0381  | -0.0030 | 0.0008  | 0.0381  |
| 4 | 3 | 0 | 0.0001  | 0.0003  | -0.0129 | -0.0004 | 0.0000  | 0.0017  |
| 4 | 0 | 3 | 0.0001  | -0.0004 | 0.0017  | 0.0003  | 0.0000  | -0.0129 |
| 4 | 3 | 1 | 0.0009  | -0.0011 | 0.0266  | -0.0012 | -0.0007 | -0.0000 |
| 4 | 1 | 3 | 0.0009  | -0.0012 | -0.0000 | -0.0011 | -0.0007 | 0.0266  |
| 4 | 3 | 2 | 0.0010  | -0.0019 | 0.0333  | -0.0009 | -0.0002 | 0.0131  |
| 4 | 2 | 3 | 0.0010  | -0.0009 | 0.0131  | -0.0019 | -0.0002 | 0.0333  |
| 4 | 3 | 3 | 0.0001  | -0.0003 | 0.0053  | -0.0003 | 0.0000  | 0.0053  |
| 4 | 4 | 0 | -0.0001 | 0.0003  | -0.0077 | 0.0000  | -0.0001 | 0.0014  |
| 4 | 0 | 4 | -0.0001 | 0.0000  | 0.0014  | 0.0003  | -0.0001 | -0.0077 |
| 4 | 4 | 1 | 0.0003  | -0.0005 | 0.0135  | -0.0006 | -0.0002 | 0.0003  |
| 4 | 1 | 4 | 0.0003  | -0.0006 | 0.0003  | -0.0005 | -0.0002 | 0.0135  |
| 4 | 4 | 2 | 0.0004  | -0.0008 | 0.0177  | -0.0004 | -0.0001 | 0.0068  |
| 4 | 2 | 4 | 0.0004  | -0.0004 | 0.0068  | -0.0008 | -0.0001 | 0.0177  |
| 4 | 4 | 3 | -0.0000 | -0.0000 | 0.0028  | -0.0001 | 0.0000  | 0.0019  |
| 4 | 3 | 4 | -0.0000 | -0.0001 | 0.0019  | -0.0000 | 0.0000  | 0.0028  |
| 4 | 4 | 4 | -0.0000 | 0.0000  | 0.0005  | 0.0000  | -0.0000 | 0.0005  |
| 5 | 1 | 0 | 0.0000  | 0.0003  | -0.0080 | 0.0002  | -0.0004 | -0.0027 |
| 5 | 0 | 1 | 0.0000  | 0.0002  | -0.0027 | 0.0003  | -0.0004 | -0.0080 |
| 5 | 1 | 1 | 0.0001  | -0.0003 | -0.0015 | -0.0003 | 0.0008  | -0.0015 |
| 5 | 2 | 0 | 0.0004  | -0.0003 | 0.0035  | -0.0007 | 0.0004  | 0.0003  |
| 5 | 0 | 2 | 0.0004  | -0.0007 | 0.0003  | -0.0003 | 0.0004  | 0.0035  |
| 5 | 2 | 1 | 0.0006  | -0.0006 | 0.0037  | -0.0013 | 0.0011  | 0.0036  |
| 5 | 1 | 2 | 0.0006  | -0.0013 | 0.0036  | -0.0006 | 0.0011  | 0.0037  |

|   |    |    |         |         |         |         |         |         |
|---|----|----|---------|---------|---------|---------|---------|---------|
| 5 | 2  | 2  | 0.0015  | -0.0018 | 0.0173  | -0.0018 | 0.0009  | 0.0173  |
| 5 | 3  | 0  | 0.0001  | -0.0002 | -0.0012 | -0.0001 | -0.0001 | -0.0005 |
| 5 | 0  | 3  | 0.0001  | -0.0001 | -0.0005 | -0.0002 | -0.0001 | -0.0012 |
| 5 | 3  | 1  | 0.0005  | -0.0005 | 0.0112  | -0.0009 | -0.0001 | -0.0019 |
| 5 | 1  | 3  | 0.0005  | -0.0009 | -0.0019 | -0.0005 | -0.0001 | 0.0112  |
| 5 | 3  | 2  | 0.0008  | -0.0012 | 0.0242  | -0.0007 | -0.0003 | 0.0089  |
| 5 | 2  | 3  | 0.0008  | -0.0007 | 0.0089  | -0.0012 | -0.0003 | 0.0242  |
| 5 | 3  | 3  | -0.0002 | 0.0003  | 0.0001  | 0.0003  | -0.0005 | 0.0001  |
| 5 | 4  | 0  | -0.0000 | 0.0001  | -0.0026 | 0.0000  | -0.0001 | -0.0007 |
| 5 | 0  | 4  | -0.0000 | 0.0000  | -0.0007 | 0.0001  | -0.0001 | -0.0026 |
| 5 | 4  | 1  | 0.0003  | -0.0003 | 0.0089  | -0.0004 | -0.0000 | -0.0015 |
| 5 | 1  | 4  | 0.0003  | -0.0004 | -0.0015 | -0.0003 | -0.0000 | 0.0089  |
| 5 | 4  | 2  | 0.0005  | -0.0007 | 0.0152  | -0.0004 | -0.0001 | 0.0049  |
| 5 | 2  | 4  | 0.0005  | -0.0004 | 0.0049  | -0.0007 | -0.0001 | 0.0152  |
| 5 | 4  | 3  | -0.0001 | 0.0003  | -0.0010 | 0.0002  | -0.0002 | -0.0003 |
| 5 | 3  | 4  | -0.0001 | 0.0002  | -0.0003 | 0.0003  | -0.0002 | -0.0010 |
| 5 | 4  | 4  | -0.0001 | 0.0002  | -0.0008 | 0.0002  | -0.0001 | -0.0008 |
| 1 | -1 | -1 | -0.0017 | -0.0001 | -0.0473 | -0.0001 | -0.4238 | -0.0473 |
| 1 | -2 | -1 | -0.0010 | 0.0030  | -0.0431 | 0.0079  | -0.0064 | -0.0248 |
| 1 | -1 | -2 | -0.0010 | 0.0079  | -0.0248 | 0.0030  | -0.0064 | -0.0431 |
| 1 | -2 | -2 | -0.0011 | 0.0018  | -0.0210 | 0.0018  | -0.0015 | -0.0210 |
| 1 | -3 | -1 | -0.0002 | 0.0014  | -0.0105 | -0.0002 | -0.0063 | -0.0013 |
| 1 | -1 | -3 | -0.0002 | -0.0002 | -0.0013 | 0.0014  | -0.0063 | -0.0105 |
| 1 | -3 | -2 | -0.0001 | 0.0009  | -0.0044 | 0.0002  | -0.0018 | -0.0005 |
| 1 | -2 | -3 | -0.0001 | 0.0002  | -0.0005 | 0.0009  | -0.0018 | -0.0044 |
| 1 | -3 | -3 | -0.0001 | 0.0002  | 0.0017  | 0.0002  | -0.0011 | 0.0017  |
| 2 | -1 | -1 | -0.0039 | 0.0066  | -0.0374 | 0.0066  | -0.0504 | -0.0374 |
| 2 | -2 | -1 | -0.0032 | 0.0040  | -0.0798 | 0.0059  | -0.0000 | -0.0395 |
| 2 | -1 | -2 | -0.0032 | 0.0059  | -0.0395 | 0.0040  | -0.0000 | -0.0798 |
| 2 | -2 | -2 | -0.0032 | 0.0043  | -0.0863 | 0.0043  | -0.0004 | -0.0863 |
| 2 | -3 | -1 | -0.0008 | 0.0022  | -0.0288 | 0.0011  | -0.0010 | -0.0063 |
| 2 | -1 | -3 | -0.0008 | 0.0011  | -0.0063 | 0.0022  | -0.0010 | -0.0288 |
| 2 | -3 | -2 | -0.0008 | 0.0025  | -0.0331 | 0.0007  | -0.0006 | -0.0133 |
| 2 | -2 | -3 | -0.0008 | 0.0007  | -0.0133 | 0.0025  | -0.0006 | -0.0331 |
| 2 | -3 | -3 | -0.0002 | 0.0004  | -0.0031 | 0.0004  | -0.0005 | -0.0031 |
| 3 | -1 | -1 | -0.0038 | 0.0057  | -0.0160 | 0.0057  | -0.0391 | -0.0160 |
| 3 | -2 | -1 | -0.0032 | 0.0034  | -0.0547 | 0.0058  | -0.0012 | -0.0359 |
| 3 | -1 | -2 | -0.0032 | 0.0058  | -0.0359 | 0.0034  | -0.0012 | -0.0547 |
| 3 | -2 | -2 | -0.0035 | 0.0045  | -0.0727 | 0.0045  | 0.0002  | -0.0727 |
| 3 | -3 | -1 | -0.0010 | 0.0018  | -0.0272 | 0.0014  | -0.0005 | -0.0068 |
| 3 | -1 | -3 | -0.0010 | 0.0014  | -0.0068 | 0.0018  | -0.0005 | -0.0272 |
| 3 | -3 | -2 | -0.0008 | 0.0019  | -0.0341 | 0.0010  | 0.0003  | -0.0162 |
| 3 | -2 | -3 | -0.0008 | 0.0010  | -0.0162 | 0.0019  | 0.0003  | -0.0341 |
| 3 | -3 | -3 | -0.0002 | 0.0004  | -0.0064 | 0.0004  | -0.0001 | -0.0064 |
| 4 | -1 | -1 | -0.0017 | 0.0025  | -0.0058 | 0.0025  | -0.0083 | -0.0058 |
| 4 | -2 | -1 | -0.0018 | 0.0018  | -0.0193 | 0.0035  | -0.0025 | -0.0102 |
| 4 | -1 | -2 | -0.0018 | 0.0035  | -0.0102 | 0.0018  | -0.0025 | -0.0193 |
| 4 | -2 | -2 | -0.0024 | 0.0027  | -0.0331 | 0.0027  | -0.0007 | -0.0331 |
| 4 | -3 | -1 | -0.0007 | 0.0007  | -0.0129 | 0.0010  | 0.0002  | -0.0046 |
| 4 | -1 | -3 | -0.0007 | 0.0010  | -0.0046 | 0.0007  | 0.0002  | -0.0129 |
| 4 | -3 | -2 | -0.0008 | 0.0010  | -0.0180 | 0.0009  | 0.0004  | -0.0110 |
| 4 | -2 | -3 | -0.0008 | 0.0009  | -0.0110 | 0.0010  | 0.0004  | -0.0180 |
| 4 | -3 | -3 | -0.0002 | 0.0003  | -0.0050 | 0.0003  | 0.0002  | -0.0050 |
| 5 | -1 | -1 | -0.0002 | 0.0002  | 0.0045  | 0.0002  | -0.0039 | 0.0045  |
| 5 | -2 | -1 | -0.0007 | 0.0004  | 0.0020  | 0.0012  | -0.0013 | 0.0008  |
| 5 | -1 | -2 | -0.0007 | 0.0012  | 0.0008  | 0.0004  | -0.0013 | 0.0020  |
| 5 | -2 | -2 | -0.0010 | 0.0010  | -0.0036 | 0.0010  | -0.0008 | -0.0036 |
| 5 | -3 | -1 | -0.0004 | 0.0001  | -0.0016 | 0.0006  | -0.0004 | -0.0005 |

|    |    |    |         |         |         |         |         |         |
|----|----|----|---------|---------|---------|---------|---------|---------|
| 5  | -1 | -3 | -0.0004 | 0.0006  | -0.0005 | 0.0001  | -0.0004 | -0.0016 |
| 5  | -3 | -2 | -0.0005 | 0.0004  | -0.0044 | 0.0005  | 0.0001  | -0.0055 |
| 5  | -2 | -3 | -0.0005 | 0.0005  | -0.0055 | 0.0004  | 0.0001  | -0.0044 |
| 5  | -3 | -3 | -0.0002 | 0.0002  | -0.0034 | 0.0002  | 0.0004  | -0.0034 |
| -1 | -1 | 0  | 0.0052  | -0.2393 | 0.2028  | -0.0002 | 0.5796  | -0.0377 |
| -1 | 0  | -1 | 0.0052  | -0.0002 | -0.0377 | -0.2393 | 0.5796  | 0.2028  |
| -1 | 1  | -1 | -0.0049 | 0.0058  | -0.0534 | -0.0045 | 0.0093  | -0.1112 |
| -1 | -1 | 1  | -0.0049 | -0.0045 | -0.1112 | 0.0058  | 0.0093  | -0.0534 |
| -1 | -2 | 0  | 0.0104  | -0.0067 | 0.0719  | -0.0131 | 0.0068  | -0.0394 |
| -1 | 0  | -2 | 0.0104  | -0.0131 | -0.0394 | -0.0067 | 0.0068  | 0.0719  |
| -1 | 2  | -1 | -0.0021 | 0.0038  | -0.0587 | 0.0027  | -0.0029 | -0.0330 |
| -1 | -1 | 2  | -0.0021 | 0.0027  | -0.0330 | 0.0038  | -0.0029 | -0.0587 |
| -1 | -2 | 1  | -0.0033 | 0.0062  | -0.1107 | 0.0045  | 0.0007  | -0.0442 |
| -1 | 1  | -2 | -0.0033 | 0.0045  | -0.0442 | 0.0062  | 0.0007  | -0.1107 |
| -1 | 2  | -2 | -0.0020 | 0.0032  | -0.0476 | 0.0028  | -0.0010 | -0.0422 |
| -1 | -2 | 2  | -0.0020 | 0.0028  | -0.0422 | 0.0032  | -0.0010 | -0.0476 |
| -1 | -3 | 0  | 0.0008  | -0.0050 | 0.0246  | -0.0017 | 0.0092  | -0.0038 |
| -1 | 0  | -3 | 0.0008  | -0.0017 | -0.0038 | -0.0050 | 0.0092  | 0.0246  |
| -1 | 3  | -1 | -0.0004 | 0.0018  | -0.0151 | -0.0002 | 0.0021  | -0.0023 |
| -1 | -1 | 3  | -0.0004 | -0.0002 | -0.0023 | 0.0018  | 0.0021  | -0.0151 |
| -1 | -3 | 1  | -0.0007 | 0.0026  | -0.0343 | 0.0006  | 0.0005  | -0.0034 |
| -1 | 1  | -3 | -0.0007 | 0.0006  | -0.0034 | 0.0026  | 0.0005  | -0.0343 |
| -1 | 3  | -2 | -0.0004 | 0.0016  | -0.0139 | 0.0004  | -0.0014 | -0.0036 |
| -1 | -2 | 3  | -0.0004 | 0.0004  | -0.0036 | 0.0016  | -0.0014 | -0.0139 |
| -1 | -3 | 2  | -0.0005 | 0.0013  | -0.0146 | 0.0008  | -0.0008 | -0.0078 |
| -1 | 2  | -3 | -0.0005 | 0.0008  | -0.0078 | 0.0013  | -0.0008 | -0.0146 |
| -1 | 3  | -3 | -0.0001 | 0.0003  | -0.0025 | 0.0002  | -0.0006 | -0.0010 |
| -1 | -3 | 3  | -0.0001 | 0.0002  | -0.0010 | 0.0003  | -0.0006 | -0.0025 |
| -1 | 4  | -1 | -0.0001 | 0.0003  | -0.0038 | -0.0003 | 0.0007  | -0.0005 |
| -1 | -1 | 4  | -0.0001 | -0.0003 | -0.0005 | 0.0003  | 0.0007  | -0.0038 |
| -1 | 4  | -2 | -0.0001 | 0.0004  | -0.0050 | 0.0002  | -0.0005 | -0.0019 |
| -1 | -2 | 4  | -0.0001 | 0.0002  | -0.0019 | 0.0004  | -0.0005 | -0.0050 |
| -1 | 4  | -3 | -0.0000 | 0.0000  | -0.0010 | 0.0000  | -0.0001 | -0.0004 |
| -1 | -3 | 4  | -0.0000 | 0.0000  | -0.0004 | 0.0000  | -0.0001 | -0.0010 |
| -2 | -1 | 0  | 0.0015  | -0.0630 | 0.3490  | -0.0014 | 0.0403  | -0.0216 |
| -2 | 0  | -1 | 0.0015  | -0.0014 | -0.0216 | -0.0630 | 0.0403  | 0.3490  |
| -2 | 1  | -1 | -0.0061 | 0.0081  | -0.0454 | 0.0094  | -0.0038 | -0.0755 |
| -2 | -1 | 1  | -0.0061 | 0.0094  | -0.0755 | 0.0081  | -0.0038 | -0.0454 |
| -2 | -2 | 0  | 0.0046  | -0.0075 | 0.0533  | -0.0033 | 0.0018  | -0.0298 |
| -2 | 0  | -2 | 0.0046  | -0.0033 | -0.0298 | -0.0075 | 0.0018  | 0.0533  |
| -2 | 2  | -1 | -0.0034 | 0.0047  | -0.0857 | 0.0025  | 0.0027  | -0.0323 |
| -2 | -1 | 2  | -0.0034 | 0.0025  | -0.0323 | 0.0047  | 0.0027  | -0.0857 |
| -2 | -2 | 1  | -0.0050 | 0.0062  | -0.1237 | 0.0078  | 0.0001  | -0.0586 |
| -2 | 1  | -2 | -0.0050 | 0.0078  | -0.0586 | 0.0062  | 0.0001  | -0.1237 |
| -2 | 2  | -2 | -0.0032 | 0.0053  | -0.0987 | 0.0039  | -0.0004 | -0.0809 |
| -2 | -2 | 2  | -0.0032 | 0.0039  | -0.0809 | 0.0053  | -0.0004 | -0.0987 |
| -2 | -3 | 0  | 0.0003  | -0.0022 | 0.0247  | 0.0004  | 0.0011  | -0.0073 |
| -2 | 0  | -3 | 0.0003  | 0.0004  | -0.0073 | -0.0022 | 0.0011  | 0.0247  |
| -2 | 3  | -1 | -0.0007 | 0.0027  | -0.0308 | 0.0007  | 0.0006  | -0.0071 |
| -2 | -1 | 3  | -0.0007 | 0.0007  | -0.0071 | 0.0027  | 0.0006  | -0.0308 |
| -2 | -3 | 1  | -0.0012 | 0.0030  | -0.0443 | 0.0015  | 0.0008  | -0.0073 |
| -2 | 1  | -3 | -0.0012 | 0.0015  | -0.0073 | 0.0030  | 0.0008  | -0.0443 |
| -2 | 3  | -2 | -0.0007 | 0.0031  | -0.0419 | 0.0006  | -0.0010 | -0.0133 |
| -2 | -2 | 3  | -0.0007 | 0.0006  | -0.0133 | 0.0031  | -0.0010 | -0.0419 |
| -2 | -3 | 2  | -0.0007 | 0.0023  | -0.0304 | 0.0009  | -0.0003 | -0.0151 |
| -2 | 2  | -3 | -0.0007 | 0.0009  | -0.0151 | 0.0023  | -0.0003 | -0.0304 |
| -2 | 3  | -3 | -0.0001 | 0.0004  | -0.0031 | 0.0004  | -0.0007 | -0.0025 |
| -2 | -3 | 3  | -0.0001 | 0.0004  | -0.0025 | 0.0004  | -0.0007 | -0.0031 |

|    |    |    |         |         |         |         |         |         |
|----|----|----|---------|---------|---------|---------|---------|---------|
| -2 | 4  | -1 | -0.0001 | 0.0007  | -0.0102 | 0.0000  | 0.0003  | -0.0006 |
| -2 | -1 | 4  | -0.0001 | 0.0000  | -0.0006 | 0.0007  | 0.0003  | -0.0102 |
| -2 | 4  | -2 | -0.0002 | 0.0009  | -0.0142 | 0.0001  | -0.0005 | -0.0025 |
| -2 | -2 | 4  | -0.0002 | 0.0001  | -0.0025 | 0.0009  | -0.0005 | -0.0142 |
| -2 | 4  | -3 | -0.0000 | 0.0000  | 0.0003  | 0.0001  | -0.0002 | 0.0005  |
| -2 | -3 | 4  | -0.0000 | 0.0001  | 0.0005  | 0.0000  | -0.0002 | 0.0003  |
| -3 | -1 | 0  | -0.0004 | -0.0175 | 0.1098  | 0.0009  | 0.0402  | -0.0060 |
| -3 | 0  | -1 | -0.0004 | 0.0009  | -0.0060 | -0.0175 | 0.0402  | 0.1098  |
| -3 | 1  | -1 | -0.0038 | 0.0053  | -0.0212 | 0.0048  | -0.0045 | -0.0264 |
| -3 | -1 | 1  | -0.0038 | 0.0048  | -0.0264 | 0.0053  | -0.0045 | -0.0212 |
| -3 | -2 | 0  | 0.0021  | -0.0050 | 0.0406  | -0.0013 | 0.0013  | -0.0143 |
| -3 | 0  | -2 | 0.0021  | -0.0013 | -0.0143 | -0.0050 | 0.0013  | 0.0406  |
| -3 | 2  | -1 | -0.0024 | 0.0030  | -0.0443 | 0.0027  | 0.0013  | -0.0232 |
| -3 | -1 | 2  | -0.0024 | 0.0027  | -0.0232 | 0.0030  | 0.0013  | -0.0443 |
| -3 | -2 | 1  | -0.0033 | 0.0038  | -0.0607 | 0.0052  | -0.0009 | -0.0238 |
| -3 | 1  | -2 | -0.0033 | 0.0052  | -0.0238 | 0.0038  | -0.0009 | -0.0607 |
| -3 | 2  | -2 | -0.0025 | 0.0035  | -0.0603 | 0.0033  | -0.0001 | -0.0553 |
| -3 | -2 | 2  | -0.0025 | 0.0033  | -0.0553 | 0.0035  | -0.0001 | -0.0603 |
| -3 | -3 | 0  | -0.0005 | 0.0001  | 0.0180  | 0.0001  | 0.0015  | -0.0057 |
| -3 | 0  | -3 | -0.0005 | 0.0001  | -0.0057 | 0.0001  | 0.0015  | 0.0180  |
| -3 | 3  | -1 | -0.0006 | 0.0016  | -0.0245 | 0.0006  | 0.0012  | -0.0033 |
| -3 | -1 | 3  | -0.0006 | 0.0006  | -0.0033 | 0.0016  | 0.0012  | -0.0245 |
| -3 | -3 | 1  | -0.0009 | 0.0015  | -0.0304 | 0.0014  | 0.0009  | -0.0092 |
| -3 | 1  | -3 | -0.0009 | 0.0014  | -0.0092 | 0.0015  | 0.0009  | -0.0304 |
| -3 | 3  | -2 | -0.0005 | 0.0019  | -0.0302 | 0.0005  | -0.0002 | -0.0110 |
| -3 | -2 | 3  | -0.0005 | 0.0005  | -0.0110 | 0.0019  | -0.0002 | -0.0302 |
| -3 | -3 | 2  | -0.0006 | 0.0015  | -0.0274 | 0.0008  | 0.0001  | -0.0138 |
| -3 | 2  | -3 | -0.0006 | 0.0008  | -0.0138 | 0.0015  | 0.0001  | -0.0274 |
| -3 | 3  | -3 | -0.0001 | 0.0004  | -0.0038 | 0.0003  | -0.0004 | -0.0033 |
| -3 | -3 | 3  | -0.0001 | 0.0003  | -0.0033 | 0.0004  | -0.0004 | -0.0038 |
| -3 | 4  | -1 | -0.0001 | 0.0006  | -0.0080 | 0.0000  | 0.0003  | -0.0027 |
| -3 | -1 | 4  | -0.0001 | 0.0000  | -0.0027 | 0.0006  | 0.0003  | -0.0080 |
| -3 | 4  | -2 | -0.0001 | 0.0006  | -0.0097 | 0.0002  | -0.0002 | -0.0033 |
| -3 | -2 | 4  | -0.0001 | 0.0002  | -0.0033 | 0.0006  | -0.0002 | -0.0097 |
| -3 | 4  | -3 | -0.0000 | 0.0001  | -0.0018 | 0.0001  | -0.0002 | -0.0010 |
| -3 | -3 | 4  | -0.0000 | 0.0001  | -0.0010 | 0.0001  | -0.0002 | -0.0018 |
| -4 | -1 | 0  | -0.0008 | -0.0083 | 0.0207  | 0.0014  | 0.0097  | -0.0001 |
| -4 | 0  | -1 | -0.0008 | 0.0014  | -0.0001 | -0.0083 | 0.0097  | 0.0207  |
| -4 | 1  | -1 | -0.0017 | 0.0027  | -0.0102 | 0.0026  | -0.0051 | -0.0001 |
| -4 | -1 | 1  | -0.0017 | 0.0026  | -0.0001 | 0.0027  | -0.0051 | -0.0102 |
| -4 | -2 | 0  | 0.0001  | -0.0004 | -0.0011 | 0.0008  | 0.0013  | -0.0013 |
| -4 | 0  | -2 | 0.0001  | 0.0008  | -0.0013 | -0.0004 | 0.0013  | -0.0011 |
| -4 | 2  | -1 | -0.0026 | 0.0028  | -0.0259 | 0.0039  | -0.0011 | -0.0055 |
| -4 | -1 | 2  | -0.0026 | 0.0039  | -0.0055 | 0.0028  | -0.0011 | -0.0259 |
| -4 | -2 | 1  | -0.0023 | 0.0021  | -0.0186 | 0.0043  | -0.0030 | -0.0199 |
| -4 | 1  | -2 | -0.0023 | 0.0043  | -0.0199 | 0.0021  | -0.0030 | -0.0186 |
| -4 | 2  | -2 | -0.0036 | 0.0046  | -0.0511 | 0.0039  | -0.0012 | -0.0427 |
| -4 | -2 | 2  | -0.0036 | 0.0039  | -0.0427 | 0.0046  | -0.0012 | -0.0511 |
| -4 | -3 | 0  | -0.0004 | 0.0000  | 0.0007  | 0.0008  | -0.0000 | -0.0013 |
| -4 | 0  | -3 | -0.0004 | 0.0008  | -0.0013 | 0.0000  | -0.0000 | 0.0007  |
| -4 | 3  | -1 | -0.0015 | 0.0018  | -0.0352 | 0.0023  | 0.0007  | -0.0055 |
| -4 | -1 | 3  | -0.0015 | 0.0023  | -0.0055 | 0.0018  | 0.0007  | -0.0352 |
| -4 | -3 | 1  | -0.0009 | 0.0006  | -0.0136 | 0.0014  | 0.0002  | -0.0011 |
| -4 | 1  | -3 | -0.0009 | 0.0014  | -0.0011 | 0.0006  | 0.0002  | -0.0136 |
| -4 | 3  | -2 | -0.0019 | 0.0030  | -0.0601 | 0.0020  | 0.0006  | -0.0263 |
| -4 | -2 | 3  | -0.0019 | 0.0020  | -0.0263 | 0.0030  | 0.0006  | -0.0601 |
| -4 | -3 | 2  | -0.0012 | 0.0014  | -0.0240 | 0.0012  | 0.0006  | -0.0146 |
| -4 | 2  | -3 | -0.0012 | 0.0012  | -0.0146 | 0.0014  | 0.0006  | -0.0240 |

|    |    |    |         |        |         |        |        |         |
|----|----|----|---------|--------|---------|--------|--------|---------|
| -4 | 3  | -3 | -0.0004 | 0.0005 | -0.0109 | 0.0007 | 0.0003 | -0.0099 |
| -4 | -3 | 3  | -0.0004 | 0.0007 | -0.0099 | 0.0005 | 0.0003 | -0.0109 |
| -4 | 4  | -1 | -0.0006 | 0.0009 | -0.0185 | 0.0010 | 0.0003 | -0.0007 |
| -4 | -1 | 4  | -0.0006 | 0.0010 | -0.0007 | 0.0009 | 0.0003 | -0.0185 |
| -4 | 4  | -2 | -0.0008 | 0.0015 | -0.0328 | 0.0009 | 0.0000 | -0.0122 |
| -4 | -2 | 4  | -0.0008 | 0.0009 | -0.0122 | 0.0015 | 0.0000 | -0.0328 |
| -4 | 4  | -3 | -0.0001 | 0.0001 | -0.0037 | 0.0002 | 0.0000 | -0.0032 |
| -4 | -3 | 4  | -0.0001 | 0.0002 | -0.0032 | 0.0001 | 0.0000 | -0.0037 |

## CH<sub>2</sub>OD-CH<sub>2</sub>OD

| n | m  | l  | B <sub>2α2α</sub> | B <sub>2αθ1</sub> | B <sub>θ1θ1</sub> | B <sub>2αθ2</sub> | B <sub>θ1θ2</sub> | B <sub>θ2θ2</sub> |
|---|----|----|-------------------|-------------------|-------------------|-------------------|-------------------|-------------------|
| 0 | 0  | 0  | 0.4793            | -0.2363           | 11.8024           | -0.2363           | -0.1290           | 11.8024           |
| 1 | 0  | 0  | 0.0789            | -0.2139           | -0.1680           | -0.2139           | 0.6639            | -0.1680           |
| 2 | 0  | 0  | 0.0496            | -0.0633           | 0.1332            | -0.0633           | 0.0097            | 0.1332            |
| 3 | 0  | 0  | 0.0185            | -0.0242           | 0.0138            | -0.0242           | 0.0473            | 0.0138            |
| 4 | 0  | 0  | 0.0068            | -0.0071           | 0.0149            | -0.0071           | 0.0006            | 0.0149            |
| 5 | 0  | 0  | 0.0010            | -0.0020           | -0.0010           | -0.0020           | 0.0049            | -0.0010           |
| 0 | 1  | 0  | -0.0150           | -0.0894           | 0.0456            | 0.0163            | -0.3276           | 0.0262            |
| 0 | 0  | 1  | -0.0150           | 0.0163            | 0.0262            | -0.0894           | -0.3276           | 0.0456            |
| 0 | 1  | 1  | 0.0071            | -0.0119           | 0.0889            | -0.0119           | -0.4595           | 0.0889            |
| 0 | 2  | 0  | 0.0027            | -0.0042           | 0.1616            | 0.0041            | 0.0061            | 0.0205            |
| 0 | 0  | 2  | 0.0027            | 0.0041            | 0.0205            | -0.0042           | 0.0061            | 0.1616            |
| 0 | 2  | 1  | 0.0007            | 0.0016            | 0.0302            | 0.0038            | -0.0102           | 0.0331            |
| 0 | 1  | 2  | 0.0007            | 0.0038            | 0.0331            | 0.0016            | -0.0102           | 0.0302            |
| 0 | 2  | 2  | 0.0001            | 0.0001            | 0.0141            | 0.0001            | -0.0023           | 0.0141            |
| 0 | 3  | 0  | 0.0001            | -0.0032           | 0.0648            | 0.0001            | -0.0041           | 0.0015            |
| 0 | 0  | 3  | 0.0001            | 0.0001            | 0.0015            | -0.0032           | -0.0041           | 0.0648            |
| 0 | 3  | 1  | -0.0001           | -0.0005           | 0.0013            | 0.0002            | -0.0068           | 0.0017            |
| 0 | 1  | 3  | -0.0001           | 0.0002            | 0.0017            | -0.0005           | -0.0068           | 0.0013            |
| 0 | 3  | 2  | -0.0001           | -0.0001           | 0.0013            | 0.0001            | -0.0009           | 0.0003            |
| 0 | 2  | 3  | -0.0001           | 0.0001            | 0.0003            | -0.0001           | -0.0009           | 0.0013            |
| 0 | 3  | 3  | -0.0000           | -0.0000           | 0.0002            | -0.0000           | -0.0005           | 0.0002            |
| 0 | 4  | 0  | 0.0004            | -0.0005           | 0.0069            | 0.0002            | -0.0014           | 0.0002            |
| 0 | 0  | 4  | 0.0004            | 0.0002            | 0.0002            | -0.0005           | -0.0014           | 0.0069            |
| 0 | 4  | 1  | -0.0001           | 0.0000            | -0.0012           | 0.0005            | -0.0017           | 0.0002            |
| 0 | 1  | 4  | -0.0001           | 0.0005            | 0.0002            | 0.0000            | -0.0017           | -0.0012           |
| 0 | 4  | 2  | -0.0001           | -0.0000           | -0.0005           | 0.0000            | 0.0001            | -0.0000           |
| 0 | 2  | 4  | -0.0001           | 0.0000            | -0.0000           | -0.0000           | 0.0001            | -0.0005           |
| 0 | 4  | 3  | -0.0000           | 0.0000            | -0.0004           | -0.0000           | -0.0001           | -0.0000           |
| 0 | 3  | 4  | -0.0000           | -0.0000           | -0.0000           | 0.0000            | -0.0001           | -0.0004           |
| 0 | 4  | 4  | -0.0000           | 0.0000            | -0.0001           | 0.0000            | -0.0000           | -0.0001           |
| 0 | -1 | -1 | 0.0004            | -0.0078           | -0.0038           | -0.0078           | 0.2623            | -0.0038           |
| 0 | -2 | -1 | 0.0002            | 0.0006            | -0.0045           | -0.0028           | -0.0052           | -0.0058           |
| 0 | -1 | -2 | 0.0002            | -0.0028           | -0.0058           | 0.0006            | -0.0052           | -0.0045           |
| 0 | -2 | -2 | 0.0002            | 0.0003            | -0.0041           | 0.0003            | 0.0003            | -0.0041           |
| 0 | -3 | -1 | 0.0001            | 0.0001            | 0.0022            | -0.0002           | 0.0028            | 0.0012            |
| 0 | -1 | -3 | 0.0001            | -0.0002           | 0.0012            | 0.0001            | 0.0028            | 0.0022            |
| 0 | -3 | -2 | 0.0001            | 0.0001            | 0.0015            | -0.0000           | -0.0001           | 0.0007            |
| 0 | -2 | -3 | 0.0001            | -0.0000           | 0.0007            | 0.0001            | -0.0001           | 0.0015            |
| 0 | -3 | -3 | -0.0000           | 0.0001            | -0.0006           | 0.0001            | 0.0002            | -0.0006           |
| 1 | 1  | 0  | -0.0200           | 0.2140            | -0.4910           | 0.0292            | -0.2561           | 0.0093            |
| 1 | 0  | 1  | -0.0200           | 0.0292            | 0.0093            | 0.2140            | -0.2561           | -0.4910           |
| 1 | 1  | 1  | 0.0125            | -0.0236           | 0.0675            | -0.0236           | 0.4949            | 0.0675            |
| 1 | 2  | 0  | -0.0036           | -0.0005           | 0.0370            | -0.0017           | 0.0016            | 0.0329            |
| 1 | 0  | 2  | -0.0036           | -0.0017           | 0.0329            | -0.0005           | 0.0016            | 0.0370            |
| 1 | 2  | 1  | 0.0020            | 0.0029            | 0.0485            | -0.0047           | -0.0064           | 0.0275            |

|   |   |   |         |         |         |         |         |         |
|---|---|---|---------|---------|---------|---------|---------|---------|
| 1 | 1 | 2 | 0.0020  | -0.0047 | 0.0275  | 0.0029  | -0.0064 | 0.0485  |
| 1 | 2 | 2 | 0.0008  | 0.0002  | 0.0098  | 0.0002  | -0.0024 | 0.0098  |
| 1 | 3 | 0 | 0.0002  | 0.0016  | -0.0113 | 0.0001  | -0.0009 | 0.0039  |
| 1 | 0 | 3 | 0.0002  | 0.0001  | 0.0039  | 0.0016  | -0.0009 | -0.0113 |
| 1 | 3 | 1 | 0.0001  | -0.0003 | 0.0143  | 0.0002  | 0.0009  | 0.0027  |
| 1 | 1 | 3 | 0.0001  | 0.0002  | 0.0027  | -0.0003 | 0.0009  | 0.0143  |
| 1 | 3 | 2 | -0.0000 | 0.0001  | 0.0043  | 0.0001  | -0.0014 | 0.0013  |
| 1 | 2 | 3 | -0.0000 | 0.0001  | 0.0013  | 0.0001  | -0.0014 | 0.0043  |
| 1 | 3 | 3 | -0.0001 | -0.0001 | -0.0003 | -0.0001 | 0.0002  | -0.0003 |
| 1 | 4 | 0 | 0.0001  | 0.0007  | -0.0049 | -0.0003 | -0.0003 | 0.0015  |
| 1 | 0 | 4 | 0.0001  | -0.0003 | 0.0015  | 0.0007  | -0.0003 | -0.0049 |
| 1 | 4 | 1 | -0.0001 | 0.0000  | 0.0022  | 0.0002  | 0.0008  | -0.0003 |
| 1 | 1 | 4 | -0.0001 | 0.0002  | -0.0003 | 0.0000  | 0.0008  | 0.0022  |
| 1 | 4 | 2 | -0.0000 | -0.0001 | 0.0003  | -0.0000 | -0.0000 | 0.0001  |
| 1 | 2 | 4 | -0.0000 | -0.0000 | 0.0001  | -0.0001 | -0.0000 | 0.0003  |
| 1 | 4 | 3 | -0.0000 | 0.0000  | -0.0004 | -0.0000 | 0.0000  | -0.0003 |
| 1 | 3 | 4 | -0.0000 | -0.0000 | -0.0003 | 0.0000  | 0.0000  | -0.0004 |
| 1 | 4 | 4 | -0.0000 | 0.0000  | -0.0003 | 0.0000  | 0.0001  | -0.0003 |
| 2 | 1 | 0 | -0.0109 | 0.0634  | -0.1674 | 0.0161  | -0.0957 | -0.0056 |
| 2 | 0 | 1 | -0.0109 | 0.0161  | -0.0056 | 0.0634  | -0.0957 | -0.1674 |
| 2 | 1 | 1 | 0.0086  | -0.0176 | 0.0808  | -0.0176 | 0.0752  | 0.0808  |
| 2 | 2 | 0 | 0.0031  | -0.0045 | 0.0928  | -0.0051 | 0.0059  | 0.0283  |
| 2 | 0 | 2 | 0.0031  | -0.0051 | 0.0283  | -0.0045 | 0.0059  | 0.0928  |
| 2 | 2 | 1 | 0.0025  | 0.0026  | 0.0411  | 0.0037  | -0.0156 | 0.0112  |
| 2 | 1 | 2 | 0.0025  | 0.0037  | 0.0112  | 0.0026  | -0.0156 | 0.0411  |
| 2 | 2 | 2 | 0.0021  | 0.0001  | 0.0506  | 0.0001  | -0.0045 | 0.0506  |
| 2 | 3 | 0 | -0.0002 | 0.0002  | -0.0124 | 0.0004  | -0.0044 | 0.0037  |
| 2 | 0 | 3 | -0.0002 | 0.0004  | 0.0037  | 0.0002  | -0.0044 | -0.0124 |
| 2 | 3 | 1 | 0.0007  | 0.0008  | 0.0292  | -0.0005 | -0.0047 | 0.0031  |
| 2 | 1 | 3 | 0.0007  | -0.0005 | 0.0031  | 0.0008  | -0.0047 | 0.0292  |
| 2 | 3 | 2 | 0.0004  | 0.0004  | 0.0197  | 0.0000  | -0.0025 | 0.0085  |
| 2 | 2 | 3 | 0.0004  | 0.0000  | 0.0085  | 0.0004  | -0.0025 | 0.0197  |
| 2 | 3 | 3 | -0.0001 | 0.0001  | 0.0009  | 0.0001  | -0.0008 | 0.0009  |
| 2 | 4 | 0 | -0.0001 | -0.0001 | -0.0042 | 0.0003  | 0.0000  | 0.0013  |
| 2 | 0 | 4 | -0.0001 | 0.0003  | 0.0013  | -0.0001 | 0.0000  | -0.0042 |
| 2 | 4 | 1 | 0.0001  | 0.0002  | 0.0102  | -0.0001 | -0.0017 | 0.0003  |
| 2 | 1 | 4 | 0.0001  | -0.0001 | 0.0003  | 0.0002  | -0.0017 | 0.0102  |
| 2 | 4 | 2 | 0.0002  | 0.0001  | 0.0077  | -0.0001 | -0.0006 | 0.0027  |
| 2 | 2 | 4 | 0.0002  | -0.0001 | 0.0027  | 0.0001  | -0.0006 | 0.0077  |
| 2 | 4 | 3 | -0.0001 | 0.0001  | -0.0002 | 0.0001  | -0.0000 | -0.0004 |
| 2 | 3 | 4 | -0.0001 | 0.0001  | -0.0004 | 0.0001  | -0.0000 | -0.0002 |
| 2 | 4 | 4 | -0.0000 | 0.0000  | -0.0001 | 0.0000  | 0.0002  | -0.0001 |
| 3 | 1 | 0 | -0.0041 | 0.0237  | -0.0191 | 0.0070  | -0.0389 | -0.0088 |
| 3 | 0 | 1 | -0.0041 | 0.0070  | -0.0088 | 0.0237  | -0.0389 | -0.0191 |
| 3 | 1 | 1 | 0.0041  | -0.0074 | 0.0205  | -0.0074 | 0.0364  | 0.0205  |
| 3 | 2 | 0 | 0.0004  | -0.0032 | 0.0020  | -0.0018 | 0.0071  | 0.0088  |
| 3 | 0 | 2 | 0.0004  | -0.0018 | 0.0088  | -0.0032 | 0.0071  | 0.0020  |
| 3 | 2 | 1 | 0.0021  | 0.0017  | 0.0258  | 0.0004  | -0.0105 | 0.0068  |
| 3 | 1 | 2 | 0.0021  | 0.0004  | 0.0068  | 0.0017  | -0.0105 | 0.0258  |
| 3 | 2 | 2 | 0.0021  | -0.0003 | 0.0352  | -0.0003 | -0.0027 | 0.0352  |
| 3 | 3 | 0 | 0.0001  | 0.0005  | -0.0203 | 0.0007  | -0.0014 | 0.0024  |
| 3 | 0 | 3 | 0.0001  | 0.0007  | 0.0024  | 0.0005  | -0.0014 | -0.0203 |
| 3 | 3 | 1 | 0.0007  | 0.0011  | 0.0231  | -0.0004 | -0.0032 | 0.0032  |
| 3 | 1 | 3 | 0.0007  | -0.0004 | 0.0032  | 0.0011  | -0.0032 | 0.0231  |
| 3 | 3 | 2 | 0.0004  | 0.0005  | 0.0187  | -0.0000 | -0.0021 | 0.0086  |
| 3 | 2 | 3 | 0.0004  | -0.0000 | 0.0086  | 0.0005  | -0.0021 | 0.0187  |
| 3 | 3 | 3 | 0.0001  | -0.0000 | 0.0037  | -0.0000 | -0.0007 | 0.0037  |
| 3 | 4 | 0 | -0.0002 | 0.0000  | -0.0093 | 0.0002  | 0.0005  | 0.0014  |

|   |    |    |         |         |         |         |         |         |
|---|----|----|---------|---------|---------|---------|---------|---------|
| 3 | 0  | 4  | -0.0002 | 0.0002  | 0.0014  | 0.0000  | 0.0005  | -0.0093 |
| 3 | 4  | 1  | 0.0002  | 0.0003  | 0.0088  | -0.0002 | -0.0011 | 0.0008  |
| 3 | 1  | 4  | 0.0002  | -0.0002 | 0.0008  | 0.0003  | -0.0011 | 0.0088  |
| 3 | 4  | 2  | 0.0001  | 0.0000  | 0.0066  | -0.0000 | -0.0007 | 0.0029  |
| 3 | 2  | 4  | 0.0001  | -0.0000 | 0.0029  | 0.0000  | -0.0007 | 0.0066  |
| 3 | 4  | 3  | 0.0000  | -0.0001 | 0.0014  | -0.0001 | -0.0003 | 0.0011  |
| 3 | 3  | 4  | 0.0000  | -0.0001 | 0.0011  | -0.0001 | -0.0003 | 0.0014  |
| 3 | 4  | 4  | 0.0000  | 0.0000  | 0.0004  | 0.0000  | -0.0002 | 0.0004  |
| 4 | 1  | 0  | -0.0017 | 0.0097  | -0.0177 | 0.0021  | -0.0125 | -0.0057 |
| 4 | 0  | 1  | -0.0017 | 0.0021  | -0.0057 | 0.0097  | -0.0125 | -0.0177 |
| 4 | 1  | 1  | 0.0014  | -0.0033 | 0.0078  | -0.0033 | 0.0137  | 0.0078  |
| 4 | 2  | 0  | 0.0005  | -0.0017 | 0.0080  | -0.0009 | 0.0024  | 0.0028  |
| 4 | 0  | 2  | 0.0005  | -0.0009 | 0.0028  | -0.0017 | 0.0024  | 0.0080  |
| 4 | 2  | 1  | 0.0010  | 0.0010  | 0.0068  | 0.0006  | -0.0051 | 0.0001  |
| 4 | 1  | 2  | 0.0010  | 0.0006  | 0.0001  | 0.0010  | -0.0051 | 0.0068  |
| 4 | 2  | 2  | 0.0018  | -0.0003 | 0.0210  | -0.0003 | -0.0016 | 0.0210  |
| 4 | 3  | 0  | -0.0000 | 0.0002  | -0.0092 | 0.0001  | -0.0008 | 0.0004  |
| 4 | 0  | 3  | -0.0000 | 0.0001  | 0.0004  | 0.0002  | -0.0008 | -0.0092 |
| 4 | 3  | 1  | 0.0006  | 0.0009  | 0.0148  | -0.0005 | -0.0025 | 0.0001  |
| 4 | 1  | 3  | 0.0006  | -0.0005 | 0.0001  | 0.0009  | -0.0025 | 0.0148  |
| 4 | 3  | 2  | 0.0006  | 0.0009  | 0.0166  | -0.0001 | -0.0017 | 0.0065  |
| 4 | 2  | 3  | 0.0006  | -0.0001 | 0.0065  | 0.0009  | -0.0017 | 0.0166  |
| 4 | 3  | 3  | -0.0000 | 0.0003  | 0.0027  | 0.0003  | 0.0004  | 0.0027  |
| 4 | 4  | 0  | -0.0001 | 0.0001  | -0.0033 | 0.0001  | 0.0002  | 0.0007  |
| 4 | 0  | 4  | -0.0001 | 0.0001  | 0.0007  | 0.0001  | 0.0002  | -0.0033 |
| 4 | 4  | 1  | 0.0003  | 0.0003  | 0.0076  | -0.0003 | -0.0011 | 0.0002  |
| 4 | 1  | 4  | 0.0003  | -0.0003 | 0.0002  | 0.0003  | -0.0011 | 0.0076  |
| 4 | 4  | 2  | 0.0003  | 0.0002  | 0.0097  | -0.0001 | -0.0007 | 0.0035  |
| 4 | 2  | 4  | 0.0003  | -0.0001 | 0.0035  | 0.0002  | -0.0007 | 0.0097  |
| 4 | 4  | 3  | -0.0000 | 0.0000  | 0.0016  | 0.0001  | 0.0001  | 0.0009  |
| 4 | 3  | 4  | -0.0000 | 0.0001  | 0.0009  | 0.0000  | 0.0001  | 0.0016  |
| 4 | 4  | 4  | -0.0000 | 0.0000  | 0.0003  | 0.0000  | 0.0001  | 0.0003  |
| 5 | 1  | 0  | -0.0008 | 0.0030  | -0.0102 | 0.0014  | -0.0040 | -0.0033 |
| 5 | 0  | 1  | -0.0008 | 0.0014  | -0.0033 | 0.0030  | -0.0040 | -0.0102 |
| 5 | 1  | 1  | 0.0004  | -0.0014 | 0.0019  | -0.0014 | 0.0054  | 0.0019  |
| 5 | 2  | 0  | 0.0006  | -0.0011 | 0.0064  | -0.0009 | 0.0016  | 0.0007  |
| 5 | 0  | 2  | 0.0006  | -0.0009 | 0.0007  | -0.0011 | 0.0016  | 0.0064  |
| 5 | 2  | 1  | 0.0001  | 0.0007  | -0.0005 | 0.0010  | -0.0027 | -0.0018 |
| 5 | 1  | 2  | 0.0001  | 0.0010  | -0.0018 | 0.0007  | -0.0027 | -0.0005 |
| 5 | 2  | 2  | 0.0011  | -0.0003 | 0.0098  | -0.0003 | -0.0005 | 0.0098  |
| 5 | 3  | 0  | -0.0000 | 0.0002  | -0.0017 | 0.0002  | -0.0009 | -0.0007 |
| 5 | 0  | 3  | -0.0000 | 0.0002  | -0.0007 | 0.0002  | -0.0009 | -0.0017 |
| 5 | 3  | 1  | 0.0004  | 0.0004  | 0.0064  | -0.0003 | -0.0007 | -0.0010 |
| 5 | 1  | 3  | 0.0004  | -0.0003 | -0.0010 | 0.0004  | -0.0007 | 0.0064  |
| 5 | 3  | 2  | 0.0006  | 0.0011  | 0.0119  | -0.0001 | -0.0012 | 0.0046  |
| 5 | 2  | 3  | 0.0006  | -0.0001 | 0.0046  | 0.0011  | -0.0012 | 0.0119  |
| 5 | 3  | 3  | -0.0002 | 0.0005  | 0.0001  | 0.0005  | 0.0014  | 0.0001  |
| 5 | 4  | 0  | -0.0001 | -0.0000 | -0.0009 | 0.0001  | 0.0001  | -0.0005 |
| 5 | 0  | 4  | -0.0001 | 0.0001  | -0.0005 | -0.0000 | 0.0001  | -0.0009 |
| 5 | 4  | 1  | 0.0002  | 0.0002  | 0.0050  | -0.0002 | -0.0009 | -0.0009 |
| 5 | 1  | 4  | 0.0002  | -0.0002 | -0.0009 | 0.0002  | -0.0009 | 0.0050  |
| 5 | 4  | 2  | 0.0004  | 0.0002  | 0.0085  | -0.0002 | -0.0004 | 0.0026  |
| 5 | 2  | 4  | 0.0004  | -0.0002 | 0.0026  | 0.0002  | -0.0004 | 0.0085  |
| 5 | 4  | 3  | -0.0001 | 0.0001  | -0.0001 | 0.0003  | 0.0005  | -0.0003 |
| 5 | 3  | 4  | -0.0001 | 0.0003  | -0.0003 | 0.0001  | 0.0005  | -0.0001 |
| 5 | 4  | 4  | -0.0001 | 0.0000  | -0.0002 | 0.0000  | 0.0004  | -0.0002 |
| 1 | -1 | -1 | 0.0000  | -0.0206 | 0.0267  | -0.0206 | -0.4730 | 0.0267  |
| 1 | -2 | -1 | -0.0005 | 0.0015  | -0.0285 | 0.0081  | -0.0158 | -0.0031 |



|    |    |    |         |         |         |         |         |         |
|----|----|----|---------|---------|---------|---------|---------|---------|
| 1  | -1 | -2 | -0.0005 | 0.0081  | -0.0031 | 0.0015  | -0.0158 | -0.0285 |
| 1  | -2 | -2 | -0.0008 | 0.0004  | 0.0085  | 0.0004  | 0.0018  | 0.0085  |
| 1  | -3 | -1 | 0.0000  | 0.0001  | -0.0031 | -0.0005 | -0.0034 | -0.0001 |
| 1  | -1 | -3 | 0.0000  | -0.0005 | -0.0001 | 0.0001  | -0.0034 | -0.0031 |
| 1  | -3 | -2 | -0.0000 | -0.0001 | -0.0008 | 0.0000  | -0.0001 | -0.0002 |
| 1  | -2 | -3 | -0.0000 | 0.0000  | -0.0002 | -0.0001 | -0.0001 | -0.0008 |
| 1  | -3 | -3 | -0.0000 | 0.0001  | 0.0011  | 0.0001  | -0.0005 | 0.0011  |
| 2  | -1 | -1 | -0.0024 | 0.0003  | -0.0110 | 0.0003  | -0.0560 | -0.0110 |
| 2  | -2 | -1 | -0.0027 | 0.0007  | -0.0473 | -0.0009 | 0.0079  | -0.0126 |
| 2  | -1 | -2 | -0.0027 | -0.0009 | -0.0126 | 0.0007  | 0.0079  | -0.0473 |
| 2  | -2 | -2 | -0.0019 | -0.0002 | -0.0489 | -0.0002 | 0.0049  | -0.0489 |
| 2  | -3 | -1 | -0.0005 | -0.0005 | -0.0140 | 0.0003  | 0.0030  | -0.0023 |
| 2  | -1 | -3 | -0.0005 | 0.0003  | -0.0023 | -0.0005 | 0.0030  | -0.0140 |
| 2  | -3 | -2 | -0.0004 | -0.0000 | -0.0170 | -0.0000 | 0.0016  | -0.0072 |
| 2  | -2 | -3 | -0.0004 | -0.0000 | -0.0072 | -0.0000 | 0.0016  | -0.0170 |
| 2  | -3 | -3 | -0.0001 | -0.0001 | -0.0014 | -0.0001 | 0.0013  | -0.0014 |
| 3  | -1 | -1 | -0.0028 | 0.0003  | -0.0038 | 0.0003  | -0.0360 | -0.0038 |
| 3  | -2 | -1 | -0.0024 | -0.0002 | -0.0305 | 0.0011  | 0.0085  | -0.0135 |
| 3  | -1 | -2 | -0.0024 | 0.0011  | -0.0135 | -0.0002 | 0.0085  | -0.0305 |
| 3  | -2 | -2 | -0.0025 | 0.0001  | -0.0385 | 0.0001  | 0.0034  | -0.0385 |
| 3  | -3 | -1 | -0.0007 | -0.0008 | -0.0138 | 0.0004  | 0.0019  | -0.0034 |
| 3  | -1 | -3 | -0.0007 | 0.0004  | -0.0034 | -0.0008 | 0.0019  | -0.0138 |
| 3  | -3 | -2 | -0.0005 | -0.0007 | -0.0175 | 0.0001  | 0.0019  | -0.0086 |
| 3  | -2 | -3 | -0.0005 | 0.0001  | -0.0086 | -0.0007 | 0.0019  | -0.0175 |
| 3  | -3 | -3 | -0.0000 | -0.0001 | -0.0033 | -0.0001 | 0.0001  | -0.0033 |
| 4  | -1 | -1 | -0.0012 | 0.0002  | -0.0017 | 0.0002  | -0.0062 | -0.0017 |
| 4  | -2 | -1 | -0.0013 | -0.0002 | -0.0101 | 0.0007  | 0.0029  | -0.0020 |
| 4  | -1 | -2 | -0.0013 | 0.0007  | -0.0020 | -0.0002 | 0.0029  | -0.0101 |
| 4  | -2 | -2 | -0.0016 | -0.0000 | -0.0170 | -0.0000 | 0.0016  | -0.0170 |
| 4  | -3 | -1 | -0.0005 | -0.0007 | -0.0063 | 0.0002  | 0.0016  | -0.0024 |
| 4  | -1 | -3 | -0.0005 | 0.0002  | -0.0024 | -0.0007 | 0.0016  | -0.0063 |
| 4  | -3 | -2 | -0.0005 | -0.0007 | -0.0088 | 0.0000  | 0.0011  | -0.0057 |
| 4  | -2 | -3 | -0.0005 | 0.0000  | -0.0057 | -0.0007 | 0.0011  | -0.0088 |
| 4  | -3 | -3 | -0.0001 | -0.0002 | -0.0024 | -0.0002 | -0.0002 | -0.0024 |
| 5  | -1 | -1 | 0.0000  | -0.0004 | 0.0031  | -0.0004 | -0.0035 | 0.0031  |
| 5  | -2 | -1 | -0.0004 | -0.0000 | 0.0014  | -0.0000 | 0.0006  | 0.0028  |
| 5  | -1 | -2 | -0.0004 | -0.0000 | 0.0028  | -0.0000 | 0.0006  | 0.0014  |
| 5  | -2 | -2 | -0.0006 | -0.0001 | -0.0013 | -0.0001 | 0.0001  | -0.0013 |
| 5  | -3 | -1 | -0.0002 | -0.0003 | -0.0004 | 0.0001  | -0.0003 | 0.0000  |
| 5  | -1 | -3 | -0.0002 | 0.0001  | 0.0000  | -0.0003 | -0.0003 | -0.0004 |
| 5  | -3 | -2 | -0.0004 | -0.0004 | -0.0017 | -0.0000 | 0.0003  | -0.0026 |
| 5  | -2 | -3 | -0.0004 | -0.0000 | -0.0026 | -0.0004 | 0.0003  | -0.0017 |
| 5  | -3 | -3 | -0.0001 | -0.0002 | -0.0016 | -0.0002 | 0.0000  | -0.0016 |
| -1 | -1 | 0  | 0.0053  | -0.2727 | 0.1461  | 0.0061  | 0.5373  | 0.0051  |
| -1 | 0  | -1 | 0.0053  | 0.0061  | 0.0051  | -0.2727 | 0.5373  | 0.1461  |
| -1 | 1  | -1 | -0.0035 | -0.0088 | -0.0074 | 0.0151  | -0.3326 | -0.0733 |
| -1 | -1 | 1  | -0.0035 | 0.0151  | -0.0733 | -0.0088 | -0.3326 | -0.0074 |
| -1 | -2 | 0  | 0.0086  | 0.0014  | -0.1491 | -0.0076 | 0.0019  | -0.0313 |
| -1 | 0  | -2 | 0.0086  | -0.0076 | -0.0313 | 0.0014  | 0.0019  | -0.1491 |
| -1 | 2  | -1 | -0.0013 | -0.0001 | -0.0360 | 0.0025  | -0.0009 | -0.0216 |
| -1 | -1 | 2  | -0.0013 | 0.0025  | -0.0216 | -0.0001 | -0.0009 | -0.0360 |
| -1 | -2 | 1  | -0.0034 | -0.0005 | -0.0594 | 0.0117  | 0.0054  | -0.0456 |
| -1 | 1  | -2 | -0.0034 | 0.0117  | -0.0456 | -0.0005 | 0.0054  | -0.0594 |
| -1 | 2  | -2 | -0.0014 | -0.0002 | -0.0120 | 0.0001  | 0.0035  | -0.0129 |
| -1 | -2 | 2  | -0.0014 | 0.0001  | -0.0129 | -0.0002 | 0.0035  | -0.0120 |
| -1 | -3 | 0  | 0.0006  | -0.0000 | 0.0140  | -0.0013 | 0.0059  | -0.0015 |
| -1 | 0  | -3 | 0.0006  | -0.0013 | -0.0015 | -0.0000 | 0.0059  | 0.0140  |
| -1 | 3  | -1 | -0.0002 | 0.0001  | -0.0061 | -0.0004 | 0.0031  | -0.0013 |

|    |    |    |         |         |         |         |         |         |
|----|----|----|---------|---------|---------|---------|---------|---------|
| -1 | -1 | 3  | -0.0002 | -0.0004 | -0.0013 | 0.0001  | 0.0031  | -0.0061 |
| -1 | -3 | 1  | -0.0004 | -0.0003 | -0.0180 | 0.0000  | 0.0073  | -0.0028 |
| -1 | 1  | -3 | -0.0004 | 0.0000  | -0.0028 | -0.0003 | 0.0073  | -0.0180 |
| -1 | 3  | -2 | -0.0001 | -0.0002 | -0.0059 | -0.0000 | 0.0015  | -0.0019 |
| -1 | -2 | 3  | -0.0001 | -0.0000 | -0.0019 | -0.0002 | 0.0015  | -0.0059 |
| -1 | -3 | 2  | -0.0002 | -0.0003 | -0.0072 | 0.0002  | 0.0015  | -0.0043 |
| -1 | 2  | -3 | -0.0002 | 0.0002  | -0.0043 | -0.0003 | 0.0015  | -0.0072 |
| -1 | 3  | -3 | -0.0000 | 0.0000  | -0.0013 | -0.0000 | 0.0001  | -0.0005 |
| -1 | -3 | 3  | -0.0000 | -0.0000 | -0.0005 | 0.0000  | 0.0001  | -0.0013 |
| -1 | 4  | -1 | -0.0000 | -0.0000 | -0.0012 | -0.0003 | -0.0003 | -0.0005 |
| -1 | -1 | 4  | -0.0000 | -0.0003 | -0.0005 | -0.0000 | -0.0003 | -0.0012 |
| -1 | 4  | -2 | -0.0001 | 0.0001  | -0.0021 | 0.0001  | 0.0000  | -0.0014 |
| -1 | -2 | 4  | -0.0001 | 0.0001  | -0.0014 | 0.0001  | 0.0000  | -0.0021 |
| -1 | 4  | -3 | 0.0000  | -0.0001 | -0.0005 | -0.0001 | 0.0001  | -0.0001 |
| -1 | -3 | 4  | 0.0000  | -0.0001 | -0.0001 | -0.0001 | 0.0001  | -0.0005 |
| -2 | -1 | 0  | 0.0007  | -0.0594 | 0.3359  | -0.0045 | 0.0451  | -0.0106 |
| -2 | 0  | -1 | 0.0007  | -0.0045 | -0.0106 | -0.0594 | 0.0451  | 0.3359  |
| -2 | 1  | -1 | -0.0047 | 0.0029  | -0.0243 | 0.0124  | -0.0818 | -0.0741 |
| -2 | -1 | 1  | -0.0047 | 0.0124  | -0.0741 | 0.0029  | -0.0818 | -0.0243 |
| -2 | -2 | 0  | 0.0018  | 0.0023  | -0.0647 | 0.0004  | -0.0106 | -0.0177 |
| -2 | 0  | -2 | 0.0018  | 0.0004  | -0.0177 | 0.0023  | -0.0106 | -0.0647 |
| -2 | 2  | -1 | -0.0028 | 0.0002  | -0.0490 | -0.0038 | 0.0089  | 0.0010  |
| -2 | -1 | 2  | -0.0028 | -0.0038 | 0.0010  | 0.0002  | 0.0089  | -0.0490 |
| -2 | -2 | 1  | -0.0041 | -0.0012 | -0.0472 | 0.0020  | 0.0072  | -0.0199 |
| -2 | 1  | -2 | -0.0041 | 0.0020  | -0.0199 | -0.0012 | 0.0072  | -0.0472 |
| -2 | 2  | -2 | -0.0019 | -0.0001 | -0.0515 | -0.0002 | 0.0049  | -0.0486 |
| -2 | -2 | 2  | -0.0019 | -0.0002 | -0.0486 | -0.0001 | 0.0049  | -0.0515 |
| -2 | -3 | 0  | -0.0000 | -0.0002 | 0.0147  | 0.0001  | 0.0007  | -0.0039 |
| -2 | 0  | -3 | -0.0000 | 0.0001  | -0.0039 | -0.0002 | 0.0007  | 0.0147  |
| -2 | 3  | -1 | -0.0004 | -0.0002 | -0.0145 | 0.0000  | 0.0017  | -0.0035 |
| -2 | -1 | 3  | -0.0004 | 0.0000  | -0.0035 | -0.0002 | 0.0017  | -0.0145 |
| -2 | -3 | 1  | -0.0007 | -0.0011 | -0.0229 | 0.0003  | 0.0040  | -0.0031 |
| -2 | 1  | -3 | -0.0007 | 0.0003  | -0.0031 | -0.0011 | 0.0040  | -0.0229 |
| -2 | 3  | -2 | -0.0002 | 0.0002  | -0.0204 | -0.0000 | 0.0016  | -0.0070 |
| -2 | -2 | 3  | -0.0002 | -0.0000 | -0.0070 | 0.0002  | 0.0016  | -0.0204 |
| -2 | -3 | 2  | -0.0004 | -0.0001 | -0.0157 | 0.0000  | 0.0021  | -0.0080 |
| -2 | 2  | -3 | -0.0004 | 0.0000  | -0.0080 | -0.0001 | 0.0021  | -0.0157 |
| -2 | 3  | -3 | -0.0000 | -0.0000 | -0.0015 | 0.0000  | 0.0012  | -0.0013 |
| -2 | -3 | 3  | -0.0000 | 0.0000  | -0.0013 | -0.0000 | 0.0012  | -0.0015 |
| -2 | 4  | -1 | -0.0000 | 0.0000  | -0.0048 | -0.0002 | 0.0007  | -0.0001 |
| -2 | -1 | 4  | -0.0000 | -0.0002 | -0.0001 | 0.0000  | 0.0007  | -0.0048 |
| -2 | 4  | -2 | -0.0001 | 0.0001  | -0.0066 | 0.0001  | 0.0003  | -0.0014 |
| -2 | -2 | 4  | -0.0001 | 0.0001  | -0.0014 | 0.0001  | 0.0003  | -0.0066 |
| -2 | 4  | -3 | 0.0000  | -0.0000 | 0.0003  | -0.0000 | 0.0003  | 0.0004  |
| -2 | -3 | 4  | 0.0000  | -0.0000 | 0.0004  | -0.0000 | 0.0003  | 0.0003  |
| -3 | -1 | 0  | -0.0004 | -0.0181 | 0.0745  | -0.0005 | 0.0427  | -0.0003 |
| -3 | 0  | -1 | -0.0004 | -0.0005 | -0.0003 | -0.0181 | 0.0427  | 0.0745  |
| -3 | 1  | -1 | -0.0029 | 0.0010  | -0.0095 | 0.0053  | -0.0230 | -0.0217 |
| -3 | -1 | 1  | -0.0029 | 0.0053  | -0.0217 | 0.0010  | -0.0230 | -0.0095 |
| -3 | -2 | 0  | 0.0012  | 0.0009  | -0.0058 | -0.0007 | -0.0047 | -0.0089 |
| -3 | 0  | -2 | 0.0012  | -0.0007 | -0.0089 | 0.0009  | -0.0047 | -0.0058 |
| -3 | 2  | -1 | -0.0018 | -0.0001 | -0.0242 | -0.0014 | 0.0086  | -0.0081 |
| -3 | -1 | 2  | -0.0018 | -0.0014 | -0.0081 | -0.0001 | 0.0086  | -0.0242 |
| -3 | -2 | 1  | -0.0026 | -0.0010 | -0.0275 | 0.0020  | 0.0064  | -0.0109 |
| -3 | 1  | -2 | -0.0026 | 0.0020  | -0.0109 | -0.0010 | 0.0064  | -0.0275 |
| -3 | 2  | -2 | -0.0017 | -0.0001 | -0.0312 | 0.0003  | 0.0028  | -0.0319 |
| -3 | -2 | 2  | -0.0017 | 0.0003  | -0.0319 | -0.0001 | 0.0028  | -0.0312 |
| -3 | -3 | 0  | -0.0006 | 0.0001  | 0.0096  | -0.0004 | 0.0026  | -0.0029 |

|    |    |    |         |         |         |         |         |         |
|----|----|----|---------|---------|---------|---------|---------|---------|
| -3 | 0  | -3 | -0.0006 | -0.0004 | -0.0029 | 0.0001  | 0.0026  | 0.0096  |
| -3 | 3  | -1 | -0.0004 | -0.0005 | -0.0120 | 0.0001  | 0.0019  | -0.0019 |
| -3 | -1 | 3  | -0.0004 | 0.0001  | -0.0019 | -0.0005 | 0.0019  | -0.0120 |
| -3 | -3 | 1  | -0.0005 | -0.0009 | -0.0164 | -0.0001 | 0.0033  | -0.0052 |
| -3 | 1  | -3 | -0.0005 | -0.0001 | -0.0052 | -0.0009 | 0.0033  | -0.0164 |
| -3 | 3  | -2 | -0.0002 | -0.0003 | -0.0152 | 0.0000  | 0.0016  | -0.0059 |
| -3 | -2 | 3  | -0.0002 | 0.0000  | -0.0059 | -0.0003 | 0.0016  | -0.0152 |
| -3 | -3 | 2  | -0.0003 | -0.0004 | -0.0143 | 0.0001  | 0.0015  | -0.0073 |
| -3 | 2  | -3 | -0.0003 | 0.0001  | -0.0073 | -0.0004 | 0.0015  | -0.0143 |
| -3 | 3  | -3 | 0.0000  | 0.0000  | -0.0018 | 0.0000  | 0.0005  | -0.0018 |
| -3 | -3 | 3  | 0.0000  | 0.0000  | -0.0018 | 0.0000  | 0.0005  | -0.0018 |
| -3 | 4  | -1 | -0.0000 | 0.0000  | -0.0043 | -0.0001 | 0.0007  | -0.0016 |
| -3 | -1 | 4  | -0.0000 | -0.0001 | -0.0016 | 0.0000  | 0.0007  | -0.0043 |
| -3 | 4  | -2 | -0.0000 | 0.0001  | -0.0048 | 0.0001  | 0.0005  | -0.0019 |
| -3 | -2 | 4  | -0.0000 | 0.0001  | -0.0019 | 0.0001  | 0.0005  | -0.0048 |
| -3 | 4  | -3 | 0.0000  | 0.0000  | -0.0009 | 0.0000  | 0.0002  | -0.0005 |
| -3 | -3 | 4  | 0.0000  | 0.0000  | -0.0005 | 0.0000  | 0.0002  | -0.0009 |
| -4 | -1 | 0  | -0.0007 | -0.0108 | 0.0226  | 0.0004  | 0.0124  | 0.0013  |
| -4 | 0  | -1 | -0.0007 | 0.0004  | 0.0013  | -0.0108 | 0.0124  | 0.0226  |
| -4 | 1  | -1 | -0.0009 | -0.0002 | -0.0031 | 0.0036  | -0.0170 | -0.0063 |
| -4 | -1 | 1  | -0.0009 | 0.0036  | -0.0063 | -0.0002 | -0.0170 | -0.0031 |
| -4 | -2 | 0  | -0.0005 | 0.0015  | -0.0178 | 0.0010  | -0.0014 | -0.0010 |
| -4 | 0  | -2 | -0.0005 | 0.0010  | -0.0010 | 0.0015  | -0.0014 | -0.0178 |
| -4 | 2  | -1 | -0.0018 | -0.0003 | -0.0136 | -0.0005 | 0.0064  | 0.0047  |
| -4 | -1 | 2  | -0.0018 | -0.0005 | 0.0047  | -0.0003 | 0.0064  | -0.0136 |
| -4 | -2 | 1  | -0.0014 | -0.0009 | -0.0028 | 0.0000  | 0.0047  | -0.0046 |
| -4 | 1  | -2 | -0.0014 | 0.0000  | -0.0046 | -0.0009 | 0.0047  | -0.0028 |
| -4 | 2  | -2 | -0.0025 | -0.0001 | -0.0262 | 0.0003  | 0.0023  | -0.0239 |
| -4 | -2 | 2  | -0.0025 | 0.0003  | -0.0239 | -0.0001 | 0.0023  | -0.0262 |
| -4 | -3 | 0  | -0.0003 | -0.0006 | 0.0029  | 0.0002  | 0.0018  | -0.0002 |
| -4 | 0  | -3 | -0.0003 | 0.0002  | -0.0002 | -0.0006 | 0.0018  | 0.0029  |
| -4 | 3  | -1 | -0.0011 | -0.0014 | -0.0182 | 0.0008  | 0.0037  | -0.0030 |
| -4 | -1 | 3  | -0.0011 | 0.0008  | -0.0030 | -0.0014 | 0.0037  | -0.0182 |
| -4 | -3 | 1  | -0.0005 | -0.0009 | -0.0075 | 0.0001  | 0.0010  | 0.0001  |
| -4 | 1  | -3 | -0.0005 | 0.0001  | 0.0001  | -0.0009 | 0.0010  | -0.0075 |
| -4 | 3  | -2 | -0.0012 | -0.0017 | -0.0307 | 0.0002  | 0.0030  | -0.0131 |
| -4 | -2 | 3  | -0.0012 | 0.0002  | -0.0131 | -0.0017 | 0.0030  | -0.0307 |
| -4 | -3 | 2  | -0.0008 | -0.0012 | -0.0112 | 0.0000  | 0.0015  | -0.0075 |
| -4 | 2  | -3 | -0.0008 | 0.0000  | -0.0075 | -0.0012 | 0.0015  | -0.0112 |
| -4 | 3  | -3 | -0.0002 | -0.0004 | -0.0056 | -0.0004 | -0.0007 | -0.0047 |
| -4 | -3 | 3  | -0.0002 | -0.0004 | -0.0047 | -0.0004 | -0.0007 | -0.0056 |
| -4 | 4  | -1 | -0.0004 | -0.0005 | -0.0106 | 0.0003  | 0.0022  | -0.0001 |
| -4 | -1 | 4  | -0.0004 | 0.0003  | -0.0001 | -0.0005 | 0.0022  | -0.0106 |
| -4 | 4  | -2 | -0.0006 | -0.0004 | -0.0179 | 0.0002  | 0.0013  | -0.0063 |
| -4 | -2 | 4  | -0.0006 | 0.0002  | -0.0063 | -0.0004 | 0.0013  | -0.0179 |
| -4 | 4  | -3 | 0.0000  | -0.0001 | -0.0022 | -0.0002 | 0.0000  | -0.0013 |
| -4 | -3 | 4  | 0.0000  | -0.0002 | -0.0013 | -0.0001 | 0.0000  | -0.0022 |

### CH<sub>2</sub>OH-CH<sub>2</sub>OD

| n | m | l | B <sub>00</sub> | B <sub>01</sub> | B <sub>101</sub> | B <sub>02</sub> | B <sub>102</sub> | B <sub>202</sub> |
|---|---|---|-----------------|-----------------|------------------|-----------------|------------------|------------------|
| 0 | 0 | 0 | 2.0072          | -0.4677         | 11.7975          | -0.7058         | -0.0933          | 22.1867          |
| 1 | 0 | 0 | 0.3324          | -0.4396         | -0.1562          | -0.4593         | 0.7064           | -0.1364          |
| 2 | 0 | 0 | 0.2012          | -0.1229         | 0.1265           | -0.1407         | 0.0147           | 0.1254           |
| 3 | 0 | 0 | 0.0753          | -0.0471         | 0.0124           | -0.0600         | 0.0489           | 0.0157           |
| 4 | 0 | 0 | 0.0272          | -0.0132         | 0.0136           | -0.0167         | 0.0013           | 0.0149           |
| 5 | 0 | 0 | 0.0035          | -0.0034         | -0.0014          | -0.0024         | 0.0043           | -0.0030          |

|   |    |    |         |         |         |         |         |         |
|---|----|----|---------|---------|---------|---------|---------|---------|
| 0 | 1  | 0  | -0.0597 | -0.1657 | 0.0524  | 0.0300  | -0.3170 | 0.0656  |
| 0 | 0  | 1  | 0.0538  | 0.0158  | 0.0421  | -1.0464 | -0.1169 | 0.6703  |
| 0 | 1  | 1  | 0.0189  | 0.0170  | 0.0428  | -0.0022 | -0.4291 | 0.0757  |
| 0 | 2  | 0  | 0.0109  | -0.0080 | 0.1587  | 0.0039  | 0.0069  | 0.0302  |
| 0 | 0  | 2  | 0.0209  | 0.0061  | 0.0147  | -0.0051 | -0.0047 | 0.3891  |
| 0 | 2  | 1  | 0.0031  | 0.0011  | 0.0265  | -0.0007 | -0.0018 | 0.0454  |
| 0 | 1  | 2  | 0.0053  | 0.0067  | 0.0231  | -0.0067 | -0.0058 | 0.0562  |
| 0 | 2  | 2  | 0.0007  | 0.0008  | 0.0070  | -0.0019 | -0.0023 | 0.0171  |
| 0 | 3  | 0  | 0.0005  | -0.0062 | 0.0645  | -0.0001 | -0.0034 | 0.0028  |
| 0 | 0  | 3  | 0.0008  | 0.0004  | 0.0016  | -0.0145 | -0.0043 | 0.1230  |
| 0 | 3  | 1  | -0.0003 | -0.0003 | 0.0005  | 0.0001  | -0.0044 | 0.0025  |
| 0 | 1  | 3  | 0.0002  | 0.0004  | 0.0017  | -0.0026 | -0.0056 | 0.0048  |
| 0 | 3  | 2  | -0.0004 | -0.0001 | 0.0010  | 0.0002  | -0.0003 | 0.0003  |
| 0 | 2  | 3  | -0.0003 | 0.0002  | 0.0002  | -0.0005 | -0.0006 | 0.0030  |
| 0 | 3  | 3  | -0.0001 | -0.0001 | 0.0001  | 0.0001  | -0.0002 | 0.0002  |
| 0 | 4  | 0  | 0.0015  | -0.0009 | 0.0067  | 0.0003  | -0.0014 | -0.0001 |
| 0 | 0  | 4  | 0.0019  | 0.0004  | 0.0000  | -0.0044 | -0.0010 | 0.0145  |
| 0 | 4  | 1  | -0.0004 | 0.0001  | -0.0015 | 0.0004  | -0.0014 | -0.0000 |
| 0 | 1  | 4  | -0.0003 | 0.0009  | 0.0002  | -0.0000 | -0.0016 | -0.0011 |
| 0 | 4  | 2  | -0.0003 | -0.0001 | -0.0008 | 0.0002  | 0.0001  | -0.0008 |
| 0 | 2  | 4  | -0.0002 | 0.0000  | -0.0002 | -0.0001 | 0.0001  | -0.0008 |
| 0 | 4  | 3  | -0.0000 | -0.0000 | -0.0004 | 0.0000  | -0.0000 | -0.0001 |
| 0 | 3  | 4  | -0.0000 | -0.0001 | -0.0000 | 0.0000  | -0.0000 | -0.0006 |
| 0 | 4  | 4  | -0.0001 | 0.0000  | -0.0001 | 0.0000  | -0.0000 | -0.0001 |
| 0 | -1 | -1 | 0.0001  | -0.0047 | 0.0020  | -0.0066 | 0.0610  | 0.0036  |
| 0 | -2 | -1 | 0.0007  | 0.0005  | 0.0022  | -0.0039 | -0.0041 | 0.0032  |
| 0 | -1 | -2 | 0.0010  | -0.0043 | 0.0033  | -0.0003 | 0.0001  | 0.0055  |
| 0 | -2 | -2 | 0.0008  | 0.0008  | 0.0023  | -0.0001 | -0.0016 | 0.0029  |
| 0 | -3 | -1 | 0.0005  | 0.0002  | 0.0020  | -0.0003 | 0.0005  | 0.0016  |
| 0 | -1 | -3 | 0.0004  | -0.0004 | 0.0008  | -0.0000 | 0.0011  | 0.0025  |
| 0 | -3 | -2 | 0.0004  | 0.0003  | 0.0017  | -0.0004 | -0.0006 | 0.0010  |
| 0 | -2 | -3 | 0.0003  | 0.0001  | 0.0006  | 0.0001  | -0.0009 | 0.0020  |
| 0 | -3 | -3 | -0.0000 | 0.0001  | -0.0005 | 0.0000  | -0.0002 | -0.0009 |
| 1 | 1  | 0  | -0.0769 | 0.4040  | -0.4635 | 0.0549  | -0.2891 | 0.0639  |
| 1 | 0  | 1  | 0.0181  | -0.0100 | 0.0531  | 0.0610  | -0.0097 | -0.0549 |
| 1 | 1  | 1  | 0.0346  | 0.0032  | 0.0539  | -0.0157 | 0.1039  | 0.0847  |
| 1 | 2  | 0  | -0.0134 | -0.0002 | 0.0426  | -0.0070 | -0.0006 | 0.0636  |
| 1 | 0  | 2  | -0.0148 | 0.0069  | 0.0278  | 0.0073  | -0.0088 | -0.0400 |
| 1 | 2  | 1  | 0.0108  | 0.0025  | 0.0636  | -0.0163 | -0.0029 | 0.0735  |
| 1 | 1  | 2  | 0.0138  | -0.0062 | 0.0362  | -0.0134 | -0.0037 | 0.1256  |
| 1 | 2  | 2  | 0.0044  | 0.0014  | 0.0216  | -0.0050 | -0.0051 | 0.0459  |
| 1 | 3  | 0  | 0.0012  | 0.0030  | -0.0107 | -0.0003 | -0.0018 | 0.0074  |
| 1 | 0  | 3  | 0.0011  | 0.0001  | 0.0042  | 0.0037  | -0.0011 | -0.0194 |
| 1 | 3  | 1  | 0.0005  | -0.0001 | 0.0141  | -0.0007 | -0.0023 | 0.0047  |
| 1 | 1  | 3  | 0.0017  | 0.0011  | 0.0020  | -0.0068 | -0.0012 | 0.0315  |
| 1 | 3  | 2  | -0.0001 | 0.0001  | 0.0048  | -0.0000 | -0.0016 | 0.0030  |
| 1 | 2  | 3  | 0.0004  | 0.0003  | 0.0014  | -0.0023 | -0.0016 | 0.0115  |
| 1 | 3  | 3  | -0.0003 | 0.0000  | -0.0005 | 0.0001  | -0.0003 | -0.0007 |
| 1 | 4  | 0  | 0.0004  | 0.0014  | -0.0047 | -0.0006 | -0.0006 | 0.0025  |
| 1 | 0  | 4  | 0.0004  | -0.0005 | 0.0015  | 0.0009  | 0.0000  | -0.0079 |
| 1 | 4  | 1  | -0.0004 | 0.0001  | 0.0025  | 0.0000  | 0.0001  | 0.0007  |
| 1 | 1  | 4  | -0.0001 | 0.0004  | -0.0001 | -0.0010 | -0.0002 | 0.0072  |
| 1 | 4  | 2  | -0.0002 | -0.0000 | 0.0004  | 0.0002  | -0.0001 | 0.0000  |
| 1 | 2  | 4  | -0.0000 | 0.0000  | 0.0001  | -0.0005 | -0.0000 | 0.0022  |
| 1 | 4  | 3  | -0.0002 | 0.0000  | -0.0004 | 0.0001  | 0.0000  | -0.0005 |
| 1 | 3  | 4  | -0.0002 | -0.0000 | -0.0003 | 0.0002  | 0.0001  | -0.0007 |
| 1 | 4  | 4  | -0.0001 | 0.0000  | -0.0003 | 0.0001  | 0.0000  | -0.0006 |
| 2 | 1  | 0  | -0.0405 | 0.1229  | -0.1567 | 0.0261  | -0.0966 | 0.0121  |

|   |   |   |         |         |         |         |         |         |
|---|---|---|---------|---------|---------|---------|---------|---------|
| 2 | 0 | 1 | -0.0015 | 0.0083  | 0.0103  | 0.0063  | -0.0089 | -0.0105 |
| 2 | 1 | 1 | 0.0252  | -0.0049 | 0.0383  | -0.0193 | -0.0031 | 0.0709  |
| 2 | 2 | 0 | 0.0130  | -0.0072 | 0.0834  | -0.0151 | 0.0049  | 0.0443  |
| 2 | 0 | 2 | 0.0008  | -0.0003 | 0.0193  | 0.0025  | -0.0037 | 0.0139  |
| 2 | 2 | 1 | 0.0149  | 0.0029  | 0.0563  | -0.0141 | -0.0080 | 0.0558  |
| 2 | 1 | 2 | 0.0158  | -0.0004 | 0.0235  | -0.0117 | -0.0066 | 0.1088  |
| 2 | 2 | 2 | 0.0102  | 0.0010  | 0.0446  | -0.0084 | -0.0057 | 0.0875  |
| 2 | 3 | 0 | -0.0006 | 0.0009  | -0.0122 | -0.0001 | -0.0054 | 0.0078  |
| 2 | 0 | 3 | -0.0007 | 0.0008  | 0.0043  | -0.0001 | -0.0018 | -0.0238 |
| 2 | 3 | 1 | 0.0029  | 0.0026  | 0.0283  | -0.0027 | -0.0076 | 0.0053  |
| 2 | 1 | 3 | 0.0040  | -0.0001 | 0.0023  | -0.0064 | -0.0048 | 0.0552  |
| 2 | 3 | 2 | 0.0020  | 0.0015  | 0.0196  | -0.0013 | -0.0041 | 0.0164  |
| 2 | 2 | 3 | 0.0029  | 0.0002  | 0.0086  | -0.0055 | -0.0023 | 0.0397  |
| 2 | 3 | 3 | -0.0004 | 0.0006  | 0.0008  | -0.0002 | -0.0015 | 0.0017  |
| 2 | 4 | 0 | -0.0006 | -0.0001 | -0.0043 | 0.0006  | -0.0002 | 0.0024  |
| 2 | 0 | 4 | -0.0006 | 0.0006  | 0.0012  | 0.0007  | -0.0006 | -0.0107 |
| 2 | 4 | 1 | 0.0006  | 0.0004  | 0.0104  | -0.0008 | -0.0015 | 0.0004  |
| 2 | 1 | 4 | 0.0010  | 0.0000  | 0.0001  | -0.0021 | -0.0011 | 0.0197  |
| 2 | 4 | 2 | 0.0008  | 0.0002  | 0.0077  | -0.0005 | -0.0009 | 0.0052  |
| 2 | 2 | 4 | 0.0011  | -0.0001 | 0.0026  | -0.0018 | -0.0004 | 0.0153  |
| 2 | 4 | 3 | -0.0003 | 0.0002  | -0.0002 | 0.0000  | -0.0001 | -0.0005 |
| 2 | 3 | 4 | -0.0004 | 0.0002  | -0.0003 | 0.0003  | -0.0002 | -0.0006 |
| 2 | 4 | 4 | -0.0002 | 0.0000  | -0.0002 | 0.0002  | 0.0001  | -0.0005 |
| 3 | 1 | 0 | -0.0146 | 0.0443  | -0.0141 | 0.0114  | -0.0388 | -0.0040 |
| 3 | 0 | 1 | 0.0028  | 0.0025  | -0.0015 | 0.0002  | -0.0083 | 0.0570  |
| 3 | 1 | 1 | 0.0124  | -0.0018 | 0.0105  | -0.0101 | 0.0027  | 0.0200  |
| 3 | 2 | 0 | 0.0023  | -0.0053 | -0.0011 | -0.0061 | 0.0062  | 0.0158  |
| 3 | 0 | 2 | -0.0030 | 0.0007  | 0.0059  | 0.0018  | 0.0003  | -0.0358 |
| 3 | 2 | 1 | 0.0116  | 0.0015  | 0.0317  | -0.0103 | -0.0049 | 0.0283  |
| 3 | 1 | 2 | 0.0120  | -0.0028 | 0.0117  | -0.0074 | -0.0039 | 0.0611  |
| 3 | 2 | 2 | 0.0098  | 0.0004  | 0.0335  | -0.0074 | -0.0042 | 0.0655  |
| 3 | 3 | 0 | 0.0005  | 0.0012  | -0.0200 | 0.0005  | -0.0021 | 0.0053  |
| 3 | 0 | 3 | 0.0003  | 0.0011  | 0.0028  | 0.0011  | -0.0006 | -0.0316 |
| 3 | 3 | 1 | 0.0031  | 0.0029  | 0.0225  | -0.0028 | -0.0060 | 0.0048  |
| 3 | 1 | 3 | 0.0038  | -0.0002 | 0.0027  | -0.0039 | -0.0036 | 0.0427  |
| 3 | 3 | 2 | 0.0019  | 0.0014  | 0.0189  | -0.0015 | -0.0035 | 0.0169  |
| 3 | 2 | 3 | 0.0025  | 0.0002  | 0.0087  | -0.0042 | -0.0021 | 0.0371  |
| 3 | 3 | 3 | 0.0006  | 0.0001  | 0.0036  | -0.0011 | -0.0012 | 0.0074  |
| 3 | 4 | 0 | -0.0006 | 0.0002  | -0.0093 | 0.0002  | 0.0002  | 0.0028  |
| 3 | 0 | 4 | -0.0006 | 0.0004  | 0.0014  | 0.0012  | -0.0003 | -0.0187 |
| 3 | 4 | 1 | 0.0008  | 0.0005  | 0.0090  | -0.0009 | -0.0012 | 0.0015  |
| 3 | 1 | 4 | 0.0011  | -0.0002 | 0.0007  | -0.0016 | -0.0008 | 0.0159  |
| 3 | 4 | 2 | 0.0004  | 0.0001  | 0.0067  | -0.0005 | -0.0009 | 0.0058  |
| 3 | 2 | 4 | 0.0006  | 0.0000  | 0.0028  | -0.0014 | -0.0006 | 0.0129  |
| 3 | 4 | 3 | 0.0002  | -0.0001 | 0.0014  | -0.0004 | -0.0003 | 0.0022  |
| 3 | 3 | 4 | 0.0003  | -0.0001 | 0.0010  | -0.0004 | -0.0003 | 0.0028  |
| 3 | 4 | 4 | 0.0001  | 0.0000  | 0.0004  | -0.0001 | -0.0002 | 0.0010  |
| 4 | 1 | 0 | -0.0055 | 0.0180  | -0.0154 | 0.0026  | -0.0126 | -0.0055 |
| 4 | 0 | 1 | 0.0011  | -0.0003 | -0.0027 | 0.0015  | -0.0023 | -0.0022 |
| 4 | 1 | 1 | 0.0036  | -0.0006 | 0.0009  | -0.0034 | 0.0011  | 0.0044  |
| 4 | 2 | 0 | 0.0023  | -0.0028 | 0.0064  | -0.0028 | 0.0019  | 0.0046  |
| 4 | 0 | 2 | -0.0007 | 0.0006  | 0.0009  | -0.0001 | -0.0000 | -0.0045 |
| 4 | 2 | 1 | 0.0061  | 0.0008  | 0.0104  | -0.0056 | -0.0022 | 0.0096  |
| 4 | 1 | 2 | 0.0059  | -0.0008 | 0.0030  | -0.0032 | -0.0016 | 0.0202  |
| 4 | 2 | 2 | 0.0081  | -0.0000 | 0.0196  | -0.0056 | -0.0022 | 0.0385  |
| 4 | 3 | 0 | 0.0002  | 0.0006  | -0.0089 | -0.0006 | -0.0013 | 0.0017  |
| 4 | 0 | 3 | 0.0001  | 0.0000  | 0.0007  | 0.0006  | -0.0003 | -0.0127 |
| 4 | 3 | 1 | 0.0027  | 0.0024  | 0.0141  | -0.0024 | -0.0043 | 0.0002  |

|   |    |    |         |         |         |         |         |         |
|---|----|----|---------|---------|---------|---------|---------|---------|
| 4 | 1  | 3  | 0.0028  | -0.0004 | -0.0005 | -0.0020 | -0.0021 | 0.0264  |
| 4 | 3  | 2  | 0.0028  | 0.0022  | 0.0170  | -0.0017 | -0.0034 | 0.0131  |
| 4 | 2  | 3  | 0.0033  | -0.0001 | 0.0068  | -0.0036 | -0.0014 | 0.0332  |
| 4 | 3  | 3  | 0.0001  | 0.0008  | 0.0027  | -0.0005 | -0.0012 | 0.0052  |
| 4 | 4  | 0  | -0.0004 | 0.0002  | -0.0033 | -0.0000 | -0.0001 | 0.0016  |
| 4 | 0  | 4  | -0.0005 | 0.0003  | 0.0007  | 0.0005  | -0.0002 | -0.0077 |
| 4 | 4  | 1  | 0.0012  | 0.0007  | 0.0078  | -0.0013 | -0.0014 | 0.0006  |
| 4 | 1  | 4  | 0.0012  | -0.0004 | 0.0001  | -0.0010 | -0.0006 | 0.0135  |
| 4 | 4  | 2  | 0.0014  | 0.0005  | 0.0097  | -0.0009 | -0.0011 | 0.0069  |
| 4 | 2  | 4  | 0.0015  | -0.0001 | 0.0035  | -0.0016 | -0.0005 | 0.0176  |
| 4 | 4  | 3  | -0.0000 | 0.0001  | 0.0017  | -0.0002 | -0.0002 | 0.0020  |
| 4 | 3  | 4  | -0.0001 | 0.0003  | 0.0010  | -0.0000 | -0.0004 | 0.0027  |
| 4 | 4  | 4  | -0.0001 | 0.0001  | 0.0003  | 0.0000  | -0.0000 | 0.0005  |
| 5 | 1  | 0  | -0.0028 | 0.0051  | -0.0091 | 0.0026  | -0.0035 | -0.0038 |
| 5 | 0  | 1  | -0.0002 | 0.0003  | -0.0019 | 0.0010  | -0.0001 | -0.0084 |
| 5 | 1  | 1  | 0.0000  | 0.0002  | -0.0011 | -0.0003 | 0.0002  | -0.0017 |
| 5 | 2  | 0  | 0.0027  | -0.0018 | 0.0055  | -0.0024 | 0.0012  | 0.0009  |
| 5 | 0  | 2  | 0.0011  | -0.0005 | -0.0002 | -0.0006 | 0.0002  | 0.0037  |
| 5 | 2  | 1  | 0.0021  | 0.0004  | 0.0015  | -0.0023 | -0.0007 | 0.0033  |
| 5 | 1  | 2  | 0.0015  | 0.0005  | -0.0000 | -0.0006 | -0.0007 | 0.0030  |
| 5 | 2  | 2  | 0.0050  | -0.0001 | 0.0089  | -0.0034 | -0.0008 | 0.0175  |
| 5 | 3  | 0  | 0.0002  | 0.0005  | -0.0014 | -0.0001 | -0.0012 | -0.0005 |
| 5 | 0  | 3  | 0.0002  | 0.0001  | -0.0005 | -0.0004 | -0.0003 | -0.0011 |
| 5 | 3  | 1  | 0.0017  | 0.0015  | 0.0058  | -0.0017 | -0.0025 | -0.0017 |
| 5 | 1  | 3  | 0.0015  | -0.0002 | -0.0014 | -0.0007 | -0.0008 | 0.0111  |
| 5 | 3  | 2  | 0.0026  | 0.0023  | 0.0122  | -0.0013 | -0.0027 | 0.0089  |
| 5 | 2  | 3  | 0.0030  | -0.0003 | 0.0049  | -0.0023 | -0.0007 | 0.0241  |
| 5 | 3  | 3  | -0.0007 | 0.0013  | 0.0002  | 0.0005  | -0.0007 | 0.0000  |
| 5 | 4  | 0  | -0.0001 | 0.0001  | -0.0010 | 0.0000  | -0.0002 | -0.0006 |
| 5 | 0  | 4  | -0.0002 | 0.0002  | -0.0005 | 0.0002  | -0.0002 | -0.0025 |
| 5 | 4  | 1  | 0.0010  | 0.0005  | 0.0052  | -0.0010 | -0.0011 | -0.0012 |
| 5 | 1  | 4  | 0.0009  | -0.0002 | -0.0009 | -0.0006 | -0.0003 | 0.0089  |
| 5 | 4  | 2  | 0.0017  | 0.0006  | 0.0085  | -0.0009 | -0.0009 | 0.0050  |
| 5 | 2  | 4  | 0.0017  | -0.0003 | 0.0027  | -0.0013 | -0.0003 | 0.0151  |
| 5 | 4  | 3  | -0.0004 | 0.0003  | -0.0000 | 0.0003  | 0.0000  | -0.0003 |
| 5 | 3  | 4  | -0.0006 | 0.0006  | -0.0002 | 0.0005  | -0.0002 | -0.0010 |
| 5 | 4  | 4  | -0.0003 | 0.0001  | -0.0002 | 0.0002  | 0.0002  | -0.0008 |
| 1 | -1 | -1 | -0.0040 | -0.0112 | -0.0127 | -0.0253 | -0.4442 | -0.0153 |
| 1 | -2 | -1 | -0.0030 | 0.0022  | -0.0242 | 0.0143  | -0.0106 | -0.0142 |
| 1 | -1 | -2 | -0.0019 | 0.0129  | -0.0089 | 0.0041  | -0.0040 | -0.0344 |
| 1 | -2 | -2 | -0.0038 | 0.0012  | -0.0039 | 0.0028  | 0.0009  | -0.0124 |
| 1 | -3 | -1 | 0.0001  | 0.0006  | -0.0037 | -0.0008 | -0.0043 | -0.0011 |
| 1 | -1 | -3 | -0.0005 | -0.0008 | -0.0003 | 0.0022  | -0.0048 | -0.0098 |
| 1 | -3 | -2 | 0.0000  | 0.0001  | -0.0009 | -0.0000 | -0.0001 | -0.0001 |
| 1 | -2 | -3 | -0.0004 | 0.0002  | -0.0001 | 0.0014  | -0.0005 | -0.0040 |
| 1 | -3 | -3 | -0.0001 | 0.0002  | 0.0012  | 0.0001  | -0.0003 | 0.0019  |
| 2 | -1 | -1 | -0.0128 | 0.0036  | -0.0178 | 0.0101  | -0.0506 | -0.0302 |
| 2 | -2 | -1 | -0.0109 | -0.0003 | -0.0420 | 0.0047  | 0.0086  | -0.0290 |
| 2 | -1 | -2 | -0.0111 | 0.0034  | -0.0211 | 0.0071  | 0.0056  | -0.0804 |
| 2 | -2 | -2 | -0.0101 | -0.0001 | -0.0446 | 0.0074  | 0.0042  | -0.0861 |
| 2 | -3 | -1 | -0.0022 | -0.0010 | -0.0144 | 0.0017  | 0.0024  | -0.0058 |
| 2 | -1 | -3 | -0.0029 | 0.0006  | -0.0029 | 0.0042  | 0.0017  | -0.0286 |
| 2 | -3 | -2 | -0.0019 | -0.0005 | -0.0167 | 0.0011  | 0.0025  | -0.0133 |
| 2 | -2 | -3 | -0.0025 | -0.0002 | -0.0068 | 0.0045  | 0.0017  | -0.0329 |
| 2 | -3 | -3 | -0.0004 | -0.0003 | -0.0014 | 0.0006  | 0.0013  | -0.0030 |
| 3 | -1 | -1 | -0.0131 | 0.0033  | -0.0063 | 0.0082  | -0.0356 | -0.0133 |
| 3 | -2 | -1 | -0.0107 | -0.0012 | -0.0286 | 0.0086  | 0.0081  | -0.0310 |
| 3 | -1 | -2 | -0.0108 | 0.0040  | -0.0177 | 0.0061  | 0.0035  | -0.0546 |

|    |    |    |         |         |         |         |         |         |
|----|----|----|---------|---------|---------|---------|---------|---------|
| 3  | -2 | -2 | -0.0117 | -0.0001 | -0.0377 | 0.0083  | 0.0042  | -0.0720 |
| 3  | -3 | -1 | -0.0031 | -0.0015 | -0.0142 | 0.0024  | 0.0025  | -0.0069 |
| 3  | -1 | -3 | -0.0036 | 0.0007  | -0.0034 | 0.0034  | 0.0016  | -0.0271 |
| 3  | -3 | -2 | -0.0022 | -0.0016 | -0.0176 | 0.0018  | 0.0032  | -0.0163 |
| 3  | -2 | -3 | -0.0028 | -0.0001 | -0.0085 | 0.0034  | 0.0022  | -0.0339 |
| 3  | -3 | -3 | -0.0004 | -0.0003 | -0.0034 | 0.0007  | 0.0010  | -0.0064 |
| 4  | -1 | -1 | -0.0059 | 0.0011  | -0.0023 | 0.0038  | -0.0062 | -0.0048 |
| 4  | -2 | -1 | -0.0062 | -0.0007 | -0.0095 | 0.0052  | 0.0030  | -0.0078 |
| 4  | -1 | -2 | -0.0060 | 0.0025  | -0.0039 | 0.0032  | -0.0001 | -0.0191 |
| 4  | -2 | -2 | -0.0078 | -0.0003 | -0.0162 | 0.0048  | 0.0020  | -0.0328 |
| 4  | -3 | -1 | -0.0025 | -0.0014 | -0.0065 | 0.0018  | 0.0022  | -0.0047 |
| 4  | -1 | -3 | -0.0026 | 0.0002  | -0.0023 | 0.0013  | 0.0013  | -0.0129 |
| 4  | -3 | -2 | -0.0023 | -0.0016 | -0.0090 | 0.0016  | 0.0022  | -0.0110 |
| 4  | -2 | -3 | -0.0025 | -0.0001 | -0.0058 | 0.0019  | 0.0013  | -0.0178 |
| 4  | -3 | -3 | -0.0007 | -0.0005 | -0.0025 | 0.0006  | 0.0007  | -0.0050 |
| 5  | -1 | -1 | -0.0002 | -0.0003 | 0.0028  | -0.0001 | -0.0033 | 0.0049  |
| 5  | -2 | -1 | -0.0022 | -0.0001 | 0.0017  | 0.0014  | 0.0006  | 0.0022  |
| 5  | -1 | -2 | -0.0019 | 0.0008  | 0.0016  | 0.0005  | -0.0005 | 0.0021  |
| 5  | -2 | -2 | -0.0031 | -0.0003 | -0.0007 | 0.0016  | 0.0003  | -0.0034 |
| 5  | -3 | -1 | -0.0012 | -0.0007 | -0.0005 | 0.0010  | 0.0002  | -0.0006 |
| 5  | -1 | -3 | -0.0012 | 0.0001  | 0.0001  | 0.0002  | -0.0002 | -0.0016 |
| 5  | -3 | -2 | -0.0017 | -0.0009 | -0.0018 | 0.0009  | 0.0009  | -0.0055 |
| 5  | -2 | -3 | -0.0017 | -0.0000 | -0.0027 | 0.0007  | 0.0003  | -0.0043 |
| 5  | -3 | -3 | -0.0007 | -0.0005 | -0.0016 | 0.0004  | 0.0006  | -0.0034 |
| -1 | -1 | 0  | 0.0186  | -0.5424 | 0.1201  | 0.0143  | 0.5972  | -0.0260 |
| -1 | 0  | -1 | 0.0223  | -0.0023 | -0.0118 | -0.4773 | 0.5276  | 0.2204  |
| -1 | 1  | -1 | -0.0185 | 0.0024  | -0.0226 | 0.0387  | -0.2675 | -0.1314 |
| -1 | -1 | 1  | -0.0181 | -0.0197 | -0.0648 | -0.0005 | -0.0151 | -0.0522 |
| -1 | -2 | 0  | 0.0344  | 0.0023  | -0.1504 | -0.0162 | 0.0038  | -0.0537 |
| -1 | 0  | -2 | 0.0413  | -0.0241 | -0.0210 | -0.0142 | 0.0070  | 0.0746  |
| -1 | 2  | -1 | -0.0062 | -0.0004 | -0.0302 | 0.0051  | -0.0003 | -0.0314 |
| -1 | -1 | 2  | -0.0066 | 0.0019  | -0.0193 | 0.0068  | 0.0006  | -0.0570 |
| -1 | -2 | 1  | -0.0118 | -0.0001 | -0.0679 | 0.0194  | 0.0056  | -0.0651 |
| -1 | 1  | -2 | -0.0169 | 0.0180  | -0.0382 | 0.0137  | -0.0013 | -0.1261 |
| -1 | 2  | -2 | -0.0061 | -0.0006 | -0.0198 | 0.0047  | 0.0038  | -0.0368 |
| -1 | -2 | 2  | -0.0071 | 0.0001  | -0.0205 | 0.0063  | 0.0039  | -0.0471 |
| -1 | -3 | 0  | 0.0023  | -0.0005 | 0.0138  | -0.0033 | 0.0071  | -0.0037 |
| -1 | 0  | -3 | 0.0032  | -0.0028 | -0.0018 | -0.0096 | 0.0084  | 0.0245  |
| -1 | 3  | -1 | -0.0008 | 0.0001  | -0.0063 | -0.0002 | 0.0017  | -0.0024 |
| -1 | -1 | 3  | -0.0015 | -0.0013 | -0.0013 | 0.0034  | 0.0041  | -0.0150 |
| -1 | -3 | 1  | -0.0015 | -0.0010 | -0.0171 | 0.0007  | 0.0069  | -0.0034 |
| -1 | 1  | -3 | -0.0030 | 0.0003  | -0.0027 | 0.0062  | 0.0004  | -0.0346 |
| -1 | 3  | -2 | -0.0006 | -0.0003 | -0.0057 | 0.0004  | 0.0011  | -0.0035 |
| -1 | -2 | 3  | -0.0012 | -0.0000 | -0.0020 | 0.0029  | 0.0008  | -0.0141 |
| -1 | -3 | 2  | -0.0012 | -0.0007 | -0.0070 | 0.0013  | 0.0022  | -0.0079 |
| -1 | 2  | -3 | -0.0016 | 0.0002  | -0.0040 | 0.0021  | 0.0014  | -0.0144 |
| -1 | 3  | -3 | -0.0001 | -0.0000 | -0.0011 | 0.0002  | 0.0003  | -0.0010 |
| -1 | -3 | 3  | -0.0002 | -0.0002 | -0.0004 | 0.0005  | 0.0006  | -0.0025 |
| -1 | 4  | -1 | -0.0000 | -0.0000 | -0.0012 | -0.0004 | -0.0002 | -0.0005 |
| -1 | -1 | 4  | -0.0002 | -0.0008 | -0.0003 | 0.0006  | 0.0012  | -0.0038 |
| -1 | 4  | -2 | -0.0002 | 0.0000  | -0.0020 | 0.0002  | 0.0000  | -0.0019 |
| -1 | -2 | 4  | -0.0004 | 0.0002  | -0.0013 | 0.0008  | -0.0002 | -0.0051 |
| -1 | 4  | -3 | 0.0000  | -0.0001 | -0.0005 | 0.0000  | 0.0001  | -0.0004 |
| -1 | -3 | 4  | 0.0000  | -0.0001 | -0.0001 | -0.0000 | 0.0002  | -0.0010 |
| -2 | -1 | 0  | 0.0009  | -0.1157 | 0.3270  | -0.0038 | 0.0460  | -0.0215 |
| -2 | 0  | -1 | 0.0074  | -0.0075 | -0.0098 | -0.1285 | 0.0382  | 0.3569  |
| -2 | 1  | -1 | -0.0229 | 0.0069  | -0.0259 | 0.0364  | -0.0763 | -0.1060 |
| -2 | -1 | 1  | -0.0211 | 0.0052  | -0.0428 | 0.0159  | -0.0015 | -0.0433 |

|    |    |    |         |         |         |         |         |         |
|----|----|----|---------|---------|---------|---------|---------|---------|
| -2 | -2 | 0  | 0.0067  | 0.0036  | -0.0562 | 0.0027  | -0.0092 | -0.0344 |
| -2 | 0  | -2 | 0.0189  | -0.0085 | -0.0130 | -0.0150 | 0.0025  | 0.0505  |
| -2 | 2  | -1 | -0.0111 | -0.0011 | -0.0440 | -0.0011 | 0.0105  | -0.0175 |
| -2 | -1 | 2  | -0.0125 | -0.0030 | -0.0132 | 0.0089  | 0.0080  | -0.0881 |
| -2 | -2 | 1  | -0.0175 | -0.0015 | -0.0630 | 0.0160  | 0.0026  | -0.0576 |
| -2 | 1  | -2 | -0.0208 | 0.0104  | -0.0325 | 0.0136  | 0.0008  | -0.1227 |
| -2 | 2  | -2 | -0.0094 | -0.0004 | -0.0485 | 0.0064  | 0.0053  | -0.0800 |
| -2 | -2 | 2  | -0.0107 | -0.0005 | -0.0447 | 0.0098  | 0.0052  | -0.1002 |
| -2 | -3 | 0  | -0.0003 | -0.0009 | 0.0146  | 0.0012  | 0.0021  | -0.0075 |
| -2 | 0  | -3 | 0.0012  | -0.0003 | -0.0040 | -0.0042 | 0.0013  | 0.0243  |
| -2 | 3  | -1 | -0.0017 | -0.0006 | -0.0150 | 0.0013  | 0.0011  | -0.0073 |
| -2 | -1 | 3  | -0.0026 | -0.0003 | -0.0035 | 0.0053  | 0.0038  | -0.0309 |
| -2 | -3 | 1  | -0.0032 | -0.0026 | -0.0227 | 0.0027  | 0.0066  | -0.0072 |
| -2 | 1  | -3 | -0.0043 | 0.0008  | -0.0036 | 0.0059  | 0.0022  | -0.0444 |
| -2 | 3  | -2 | -0.0012 | -0.0001 | -0.0203 | 0.0008  | 0.0023  | -0.0133 |
| -2 | -2 | 3  | -0.0022 | -0.0002 | -0.0070 | 0.0060  | 0.0017  | -0.0420 |
| -2 | -3 | 2  | -0.0019 | -0.0009 | -0.0156 | 0.0014  | 0.0037  | -0.0153 |
| -2 | 2  | -3 | -0.0025 | -0.0002 | -0.0076 | 0.0042  | 0.0023  | -0.0302 |
| -2 | 3  | -3 | -0.0001 | -0.0002 | -0.0014 | 0.0005  | 0.0011  | -0.0025 |
| -2 | -3 | 3  | -0.0001 | -0.0002 | -0.0012 | 0.0006  | 0.0014  | -0.0031 |
| -2 | 4  | -1 | -0.0002 | 0.0000  | -0.0048 | -0.0000 | 0.0007  | -0.0005 |
| -2 | -1 | 4  | -0.0005 | -0.0004 | -0.0002 | 0.0013  | 0.0012  | -0.0103 |
| -2 | 4  | -2 | -0.0003 | 0.0002  | -0.0066 | 0.0001  | 0.0003  | -0.0025 |
| -2 | -2 | 4  | -0.0006 | 0.0001  | -0.0014 | 0.0018  | 0.0001  | -0.0143 |
| -2 | 4  | -3 | 0.0000  | -0.0001 | 0.0003  | 0.0000  | 0.0002  | 0.0005  |
| -2 | -3 | 4  | 0.0000  | -0.0001 | 0.0004  | 0.0000  | 0.0003  | 0.0003  |
| -3 | -1 | 0  | -0.0030 | -0.0350 | 0.0715  | 0.0030  | 0.0421  | -0.0054 |
| -3 | 0  | -1 | -0.0003 | -0.0023 | -0.0012 | -0.0360 | 0.0420  | 0.1119  |
| -3 | 1  | -1 | -0.0137 | 0.0034  | -0.0108 | 0.0173  | -0.0235 | -0.0357 |
| -3 | -1 | 1  | -0.0134 | 0.0020  | -0.0130 | 0.0096  | 0.0007  | -0.0207 |
| -3 | -2 | 0  | 0.0044  | 0.0009  | -0.0031 | 0.0003  | -0.0035 | -0.0166 |
| -3 | 0  | -2 | 0.0090  | -0.0046 | -0.0063 | -0.0098 | 0.0018  | 0.0395  |
| -3 | 2  | -1 | -0.0079 | -0.0009 | -0.0225 | 0.0026  | 0.0083  | -0.0197 |
| -3 | -1 | 2  | -0.0085 | -0.0006 | -0.0113 | 0.0057  | 0.0052  | -0.0450 |
| -3 | -2 | 1  | -0.0114 | -0.0012 | -0.0318 | 0.0103  | 0.0029  | -0.0250 |
| -3 | 1  | -2 | -0.0131 | 0.0064  | -0.0134 | 0.0080  | -0.0003 | -0.0622 |
| -3 | 2  | -2 | -0.0080 | -0.0006 | -0.0299 | 0.0059  | 0.0036  | -0.0549 |
| -3 | -2 | 2  | -0.0087 | 0.0001  | -0.0302 | 0.0065  | 0.0035  | -0.0609 |
| -3 | -3 | 0  | -0.0026 | -0.0001 | 0.0095  | 0.0004  | 0.0031  | -0.0057 |
| -3 | 0  | -3 | -0.0017 | -0.0010 | -0.0030 | 0.0002  | 0.0020  | 0.0177  |
| -3 | 3  | -1 | -0.0016 | -0.0011 | -0.0124 | 0.0012  | 0.0022  | -0.0036 |
| -3 | -1 | 3  | -0.0023 | -0.0002 | -0.0017 | 0.0030  | 0.0032  | -0.0246 |
| -3 | -3 | 1  | -0.0026 | -0.0023 | -0.0160 | 0.0026  | 0.0051  | -0.0093 |
| -3 | 1  | -3 | -0.0031 | -0.0001 | -0.0052 | 0.0030  | 0.0027  | -0.0305 |
| -3 | 3  | -2 | -0.0012 | -0.0007 | -0.0152 | 0.0008  | 0.0022  | -0.0111 |
| -3 | -2 | 3  | -0.0018 | -0.0001 | -0.0060 | 0.0036  | 0.0015  | -0.0302 |
| -3 | -3 | 2  | -0.0016 | -0.0010 | -0.0143 | 0.0014  | 0.0026  | -0.0139 |
| -3 | 2  | -3 | -0.0019 | 0.0000  | -0.0072 | 0.0027  | 0.0016  | -0.0273 |
| -3 | 3  | -3 | -0.0001 | -0.0001 | -0.0018 | 0.0004  | 0.0008  | -0.0033 |
| -3 | -3 | 3  | -0.0001 | -0.0002 | -0.0017 | 0.0006  | 0.0009  | -0.0038 |
| -3 | 4  | -1 | -0.0002 | 0.0000  | -0.0042 | 0.0001  | 0.0007  | -0.0028 |
| -3 | -1 | 4  | -0.0005 | -0.0002 | -0.0015 | 0.0011  | 0.0009  | -0.0080 |
| -3 | 4  | -2 | -0.0002 | 0.0001  | -0.0048 | 0.0002  | 0.0004  | -0.0033 |
| -3 | -2 | 4  | -0.0004 | 0.0001  | -0.0019 | 0.0012  | 0.0003  | -0.0098 |
| -3 | 4  | -3 | 0.0000  | 0.0000  | -0.0008 | 0.0001  | 0.0001  | -0.0010 |
| -3 | -3 | 4  | 0.0000  | 0.0000  | -0.0005 | 0.0001  | 0.0002  | -0.0018 |
| -4 | -1 | 0  | -0.0041 | -0.0201 | 0.0198  | 0.0031  | 0.0130  | -0.0002 |
| -4 | 0  | -1 | -0.0022 | 0.0001  | 0.0015  | -0.0183 | 0.0103  | 0.0231  |



|    |    |    |         |         |         |         |         |         |
|----|----|----|---------|---------|---------|---------|---------|---------|
| -4 | 1  | -1 | -0.0051 | 0.0004  | -0.0038 | 0.0099  | -0.0148 | -0.0076 |
| -4 | -1 | 1  | -0.0054 | 0.0011  | 0.0014  | 0.0044  | -0.0019 | -0.0094 |
| -4 | -2 | 0  | -0.0027 | 0.0023  | -0.0157 | 0.0042  | -0.0008 | -0.0029 |
| -4 | 0  | -2 | 0.0014  | -0.0011 | 0.0011  | -0.0011 | 0.0025  | -0.0014 |
| -4 | 2  | -1 | -0.0085 | -0.0011 | -0.0128 | 0.0047  | 0.0065  | -0.0010 |
| -4 | -1 | 2  | -0.0084 | 0.0013  | 0.0005  | 0.0048  | 0.0026  | -0.0260 |
| -4 | -2 | 1  | -0.0080 | -0.0008 | -0.0079 | 0.0080  | 0.0019  | -0.0196 |
| -4 | 1  | -2 | -0.0081 | 0.0027  | -0.0084 | 0.0042  | -0.0005 | -0.0186 |
| -4 | 2  | -2 | -0.0115 | -0.0007 | -0.0249 | 0.0069  | 0.0035  | -0.0423 |
| -4 | -2 | 2  | -0.0122 | 0.0001  | -0.0220 | 0.0085  | 0.0027  | -0.0514 |
| -4 | -3 | 0  | -0.0016 | -0.0013 | 0.0025  | 0.0015  | 0.0022  | -0.0013 |
| -4 | 0  | -3 | -0.0013 | 0.0005  | -0.0003 | 0.0001  | 0.0004  | 0.0006  |
| -4 | 3  | -1 | -0.0050 | -0.0032 | -0.0185 | 0.0048  | 0.0055  | -0.0064 |
| -4 | -1 | 3  | -0.0052 | 0.0008  | -0.0022 | 0.0033  | 0.0031  | -0.0352 |
| -4 | -3 | 1  | -0.0029 | -0.0027 | -0.0064 | 0.0025  | 0.0039  | -0.0011 |
| -4 | 1  | -3 | -0.0026 | 0.0000  | 0.0004  | 0.0010  | 0.0011  | -0.0137 |
| -4 | 3  | -2 | -0.0057 | -0.0039 | -0.0311 | 0.0036  | 0.0056  | -0.0264 |
| -4 | -2 | 3  | -0.0064 | 0.0002  | -0.0136 | 0.0057  | 0.0025  | -0.0599 |
| -4 | -3 | 2  | -0.0035 | -0.0029 | -0.0116 | 0.0021  | 0.0036  | -0.0146 |
| -4 | 2  | -3 | -0.0040 | -0.0002 | -0.0077 | 0.0026  | 0.0019  | -0.0238 |
| -4 | 3  | -3 | -0.0012 | -0.0011 | -0.0058 | 0.0013  | 0.0016  | -0.0099 |
| -4 | -3 | 3  | -0.0010 | -0.0012 | -0.0048 | 0.0009  | 0.0016  | -0.0108 |
| -4 | 4  | -1 | -0.0020 | -0.0012 | -0.0106 | 0.0020  | 0.0028  | -0.0010 |
| -4 | -1 | 4  | -0.0020 | 0.0004  | -0.0000 | 0.0016  | 0.0014  | -0.0185 |
| -4 | 4  | -2 | -0.0027 | -0.0011 | -0.0181 | 0.0018  | 0.0021  | -0.0123 |
| -4 | -2 | 4  | -0.0028 | 0.0003  | -0.0064 | 0.0029  | 0.0009  | -0.0327 |
| -4 | 4  | -3 | -0.0002 | -0.0004 | -0.0023 | 0.0005  | 0.0006  | -0.0032 |
| -4 | -3 | 4  | 0.0000  | -0.0006 | -0.0014 | 0.0002  | 0.0008  | -0.0037 |
